# Supplementary material for: ESR2 gene variants (rs1256049, rs4986938, and rs1256030) and their association with breast cancer risk
Source: PeerJ. 2022 May 10;10:e13379. doi: 10.7717/peerj.13379 (PMC9104083; doi:10.7717/peerj.13379)
Supplement: Supplemental Information 1 [file peerj-10-13379-s001.xlsx]

## Sheet: Hoja1
GROUP (1 BC, 0 CONTROL)	rs1256049 G/A	allele reference (G=1), allele antered (A=0)				rs4986938G/A	allele reference (G=1), allele antered (A=0)						rs1256030C/T	allele reference (C=1), allele antered (T=0)						AGE	AGE (1=50 AND MORE, 0 =LESS 50 YEARS OLD)	Presence of the first menarche	MENOPAUSE (1=yes, 0=no)	TOBACCO (1=yes, 0=no)	ALCOHOL (1=yes, 0=no)	STAGE	classified stage (1=4 and 3 stage; 0=1 and 2 stage)	Type (0 ductal, 1other)	NULIPARITY (1)	ABORTIONS (1)	NUMBER OF PREGNANCY (1= LESS OF 3, 0= 3 O MORE)	BREASTFEEDING (1 )moer than 6 month	NO BREASTFEEDING (1)	LUMINAL A (1)	LUMINAL B (1)	HER2 (1)	TRIPLE NEGATIVE (1)	KI67 (1)	NORMAL BMI (1) body mass index	OVERWEIGHT (1) 25.0 – 29.9	OBESITY (1) 30.0 – 34.9	OBESITY II (1) 35.0 – 39.9	OBESITY III (1) ≥ 40.0	lymph node metastatic (1)	NO RESPONSE TO CHEMOTHERAPY (1)	PARTIAL RESPONSE TO CHEMOTHERAPY (1)	NO RESPONSE DUE TO RECURRENCE TO CHEMOTHERAPY (1)	RESPUESTA A QUIMIOTERAPIA (1)	METASTASIS (1)
1	GG	G	G	1	0	GG	G	G	1	0	0	0	CT	C	T	0	1	0	1	51	1	15	1	0	0	4	1	0	0	1	1	0	0	0	0	1	0	30	0	0	0	0	0	1	0	0	1	0	1
1	GG	G	G	1	0	GA	G	A	0	1	0	1	CC	C	C	1	0	0	0	51	1	12	1	0	0	4	1	1	0	0	1	1	0	1	0	0	0	10	0	0	0	0	0	0	0	0	1	0	1
1	GG	G	G	1	0	GG	G	G	1	0	0	0	CT	C	T	0	1	0	1	64	1	16	1	0	0	2	0	0	0	0	0	0	1	1	0	0	0	14	0	1	0	0	1	0	0	0	0	1	0
1	GG	G	G	1	0	GG	G	G	1	0	0	0	CC	C	C	1	0	0	0	44	0	13	0	0	0	3	1	0	1	0	1	1	0	0	0	1	0	73	0	0	1	0	1	0	0	1	0	0	0
1	GG	G	G	1	0	GG	G	G	1	0	0	0	CT	C	T	0	1	0	1	55	1	11	1	0	0	3	1	0	0	1	0	1	1	0	0	1	0	10	0	1	0	0	1	0	0	0	0	1	0
1	GG	G	G	1	0	GG	G	G	1	0	0	0	TT	T	T	0	0	1	1	55	1	13	1	0	0	3	1	0	0	0	1	1	0	1	0	0	0	10	0	1	0	0	1	0	0	1	0	0	0
1	GG	G	G	1	0	GG	G	G	1	0	0	0	CC	C	C	1	0	0	0	68	1	12	1	0	0	4	1	0	0	1	1	1	0	1	0	0	0	10	0	1	0	0	1	0	0	0	1	0	1
1	GG	G	G	1	0	GG	G	G	1	0	0	0	CT	C	T	0	1	0	1	84	1	15	1	0	0	4	1	0	0	0	0	1	0	0	0	0	1	90	0	0	0	0	0	0	0	0	1	0	1
1	GG	G	G	1	0	GA	G	A	0	1	0	1	CT	C	T	0	1	0	1	79	1	15	1	0	0	4	1	0	0	0	1	1	0	1	0	0	0	30	0	1	0	0	1	1	0	0	1	0	1
1	GG	G	G	1	0	GG	G	G	1	0	0	0	CT	C	T	0	1	0	1	29	0	12	0	0	0	2	0	0	0	0	1	1	0	0	0	0	1	70	1	0	0	0	0	0	0	1	0	0	0
1	GG	G	G	1	0	GA	G	A	0	1	0	1	TT	T	T	0	0	1	1	52	1	11	1	0	0	3	1	0	0	1	0	1	0	0	0	0	1	80	0	0	1	0	1	0	0	1	0	0	0
1	GG	G	G	1	0	GA	G	A	0	1	0	1	CT	C	T	0	1	0	1	57	1	12	1	1	0	2	0	0	0	1	1	1	0	1	0	0	0	10	0	0	0	0	0	1	0	0	0	1	0
1	GG	G	G	1	0	GA	G	A	0	1	0	1	CC	C	C	1	0	0	0	76	1	13	1	1	0	3	1	0	0	0	1	1	0	0	0	0	1	80	1	0	0	0	0	0	0	0	0	1	0
1	GG	G	G	1	0	GA	G	A	0	1	0	1	CT	C	T	1	0	0	0	48	0	12	0	0	0	3	1	0	0	0	0	1	0	0	0	1	0	70	1	0	0	0	0	0	0	0	0	1	0
1	GG	G	G	1	0	GA	G	A	0	1	0	1	CC	C	C	1	0	0	0	65	1	11	1	0	0	4	1	0	0	0	0	1	0	1	0	0	0	14	1	0	0	0	0	0	0	0	1	0	1
1	GG	G	G	1	0	GA	G	A	0	1	0	1	CC	C	C	1	0	0	0	53	1	14	1	1	0	3	1	0	0	1	0	1	0	1	0	0	0	10	1	0	0	0	0	1	0	1	0	0	0
1	GG	G	G	1	0	GG	G	G	1	0	0	0	CC	C	C	1	0	0	0	33	0	13	0	0	0	3	1	0	0	1	1	1	0	0	0	0	1	85	0	0	1	0	1	1	0	0	1	0	1
1	GG	G	G	1	0	GA	G	A	0	1	0	1	CT	C	T	0	1	0	1	60	1	12	1	1	0	3	1	0	0	1	0	1	0	0	0	0	1	90	0	1	0	0	1	0	0	1	0	0	0
1	GG	G	G	1	0	GA	G	A	0	1	0	1	CT	C	T	0	1	0	1	56	1	12	1	0	0	3	1	0	0	0	1	1	0	1	0	0	0	20	1	0	0	0	0	1	0	1	0	0	0
1	GG	G	G	1	0	GG	G	G	1	0	0	0	TT	T	T	0	0	1	1	31	0	12	0	0	0	4	1	0	0	0	0	1	0	1	0	0	0	40	0	1	0	0	1	0	0	0	1	0	1
1	GG	G	G	1	0	GG	G	G	1	0	0	0	CC	C	C	1	0	0	0	51	1	11	1	0	0	3	1	0	0	0	0	0	0	0	1	0	0	25	1	0	0	0	0	0	0	1	0	0	0
1	GG	G	G	1	0	GA	G	A	0	1	0	1	CC	C	C	1	0	0	0	49	0	14	1	0	0	2	0	0	0	0	1	0	1	0	0	1	0	60	1	0	0	0	0	1	0	0	0	1	0
1	GG	G	G	1	0	GG	G	G	1	0	0	0	CC	C	C	1	0	0	0	52	1	12	1	0	0	4	1	0	0	1	0	0	0	0	0	1	0	20	0	1	0	0	1	0	0	0	1	0	1
1	GG	G	G	1	0	GG	G	G	1	0	0	0	CT	C	T	0	1	0	1	57	1	11	1	0	0	3	1	0	0	0	1	1	0	0	1	0	0	20	0	1	0	0	1	0	0	1	0	0	0
1	GG	G	G	1	0	GA	G	A	0	1	0	1	CC	C	C	1	0	0	0	58	1	15	1	0	0	2	0	0	0	1	1	0	0	0	0	1	0	60	1	0	0	0	0	1	0	0	0	1	0
1	GG	G	G	1	0	GG	G	G	1	0	0	0	CC	C	C	1	0	0	0	52	1	11	1	1	0	3	1	0	0	1	0	1	0	1	0	0	0	25	0	0	0	1	1	1	0	1	0	0	0
1	GG	G	G	1	0	GG	G	G	1	0	0	0	CT	C	T	0	1	0	1	52	1	12	1	0	0	2	0	0	0	0	0	1	0	0	1	0	0	30	0	1	0	0	1	0	0	1	0	0	0
1	GG	G	G	1	0	GA	G	A	0	1	0	1	CC	C	C	1	0	0	0	47	0	15	1	0	0	2	0	0	0	0	1	1	0	0	1	0	0	30	0	0	0	0	0	1	0	1	0	0	0
1	GG	G	G	1	0	GG	G	G	1	0	0	0	CT	C	T	0	1	0	1	50	1	15	1	0	0	3	1	0	0	0	1	1	0	0	1	0	0	50	0	1	0	0	1	1	0	0	0	1	0
1	GG	G	G	1	0	GA	G	A	0	1	0	1	CC	C	C	1	0	0	0	67	1	14	1	1	1	2	0	0	0	0	1	1	0	1	0	0	0	25	0	0	0	0	0	1	0	0	0	1	0
1	GG	G	G	1	0	GG	G	G	1	0	0	0	CC	C	C	1	0	0	0	47	0	12	0	1	1	2	0	0	0	0	1	0	0	0	1	0	0	80	0	1	0	0	1	1	0	0	0	1	0
1	GG	G	G	1	0	GA	G	A	0	1	0	1	CC	C	C	1	0	0	0	45	0	13	0	0	0	4	1	0	1	0	1	1	0	1	0	0	0	10	0	0	0	0	0	1	0	0	1	0	1
1	GG	G	G	1	0	GG	G	G	1	0	0	0	TT	T	T	0	0	1	1	55	1	12	1	1	0	2	0	0	0	0	1	1	0	1	0	0	0	20	1	0	0	0	0	1	1	0	0	0	0
1	GG	G	G	1	0	GA	G	A	0	1	0	1	CC	C	C	1	0	0	0	69	1	12	1	0	0	4	1	0	0	0	0	1	0	0	1	0	0	60	0	1	0	0	1	1	0	0	1	0	1
1	GG	G	G	1	0	GG	G	G	1	0	0	0	CT	C	T	0	1	0	1	54	1	15	1	1	0	4	1	0	0	0	1	0	0	1	0	0	0	10	0	0	0	1	1	0	0	0	1	0	1
1	GG	G	G	1	0	GG	G	G	1	0	0	0	CT	C	T	0	1	0	1	49	0	14	1	1	0	4	1	0	0	0	1	1	0	0	1	0	0	60	0	0	0	0	0	1	0	0	1	0	1
1	GG	G	G	1	0	GG	G	G	1	0	0	0	TT	T	T	0	0	1	1	52	1	16	1	0	0	3	1	0	0	1	1	0	1	0	0	0	1	80	1	0	0	0	0	0	0	0	0	1	0
1	GG	G	G	1	0	GA	G	A	0	1	0	1	CT	C	T	0	1	0	1	57	1	13	1	1	0	4	1	0	0	0	1	0	1	0	0	0	1	20	0	1	0	0	1	0	0	1	1	0	1
1	GG	G	G	1	0	GA	G	A	0	1	0	1	CT	C	T	0	1	0	1	66	1	13	1	0	0	4	1	0	0	0	0	0	0	1	0	0	0	10	0	0	0	0	0	0	0	1	1	0	1
1	GG	G	G	1	0	GA	G	A	0	1	0	1	CC	C	C	1	0	0	0	50	1	14	1	1	0	2	0	0	0	0	1	1	0	0	1	0	0	30	0	0	0	0	0	0	0	1	0	0	1
1	GG	G	G	1	0	GA	G	A	0	1	0	1	TT	T	T	0	0	1	1	41	0	13	0	1	0	3	1	0	0	0	1	0	1	0	1	0	0	60	0	1	0	0	1	1	0	1	0	0	0
1	GG	G	G	1	0	GG	G	G	1	0	0	0	CT	C	T	0	1	0	1	44	0	10	0	0	0	2	0	0	1	0	1	0	1	1	0	0	0	10	1	0	0	0	0	0	0	0	0	1	0
1	GG	G	G	1	0	GA	G	A	0	1	0	1	CC	C	C	1	0	0	0	61	1	13	1	1	0	2	0	0	0	0	1	1	0	0	1	0	0	40	0	0	0	0	0	0	0	0	0	1	0
1	GG	G	G	1	0	GG	G	G	1	0	0	0	CC	C	C	1	0	0	0	59	1	10	1	1	0	3	1	0	0	0	1	1	0	1	0	0	0	10	0	0	1	0	1	1	0	0	0	1	0
1	GG	G	G	1	0	GA	G	A	0	1	0	1	CC	C	C	1	0	0	0	68	1	12	1	1	1	3	1	0	0	1	1	1	0	0	0	1	0	30	1	0	0	0	0	1	0	0	0	1	0
1	GG	G	G	1	0	GA	G	A	0	1	0	1	CC	C	C	1	0	0	0	58	1	12	1	0	0	4	1	0	0	0	1	1	0	0	1	0	0	60	1	0	0	0	0	1	0	0	1	0	1
1	GG	G	G	1	0	GA	G	A	0	1	0	1	CT	C	T	0	1	0	1	54	1	12	1	0	0	3	1	0	0	0	0	0	0	0	0	0	1	50	0	1	0	0	1	1	0	1	0	0	0
1	GG	G	G	1	0	GA	G	A	0	1	0	1	CC	C	C	1	0	0	0	55	1	11	1	0	0	4	1	0	0	0	0	0	0	0	0	0	1	60	0	1	0	0	1	1	0	0	1	1	1
1	GA	G	A	0	1	GG	G	G	1	0	0	0	CC	C	C	1	0	0	0	58	1	12	1	0	0	4	1	0	0	0	1	1	0	0	0	0	1	80	1	0	0	0	0	1	0	0	1	0	1
1	GG	G	G	1	0	GG	G	G	1	0	0	0	CC	C	C	1	0	0	0	53	1	11	1	0	0	2	0	0	0	0	1	1	0	1	0	0	0	35	0	1	0	0	1	1	0	0	0	1	0
1	GG	G	G	1	0	GG	G	G	1	0	0	0	CT	C	T	0	1	0	1	43	0	12	0	1	1	2	0	0	0	0	1	0	0	0	0	0	1	70	0	0	0	0	0	0	0	0	0	1	0
1	GG	G	G	1	0	GA	G	A	0	1	0	1	CT	C	T	0	1	0	1	50	1	12	1	0	0	3	1	0	0	0	1	1	0	1	0	0	0	20	1	0	0	0	0	1	0	0	0	1	0
1	GG	G	G	1	0	GG	G	G	1	0	0	0	CT	C	T	0	1	0	1	47	0	15	1	0	0	2	0	0	0	0	1	0	0	1	0	0	0	30	1	0	0	0	0	0	0	0	0	1	0
1	GG	G	G	1	0	GA	G	A	0	1	0	1	CC	C	C	1	0	0	0	59	1	13	1	0	0	3	1	0	0	0	1	1	0	0	0	0	1	30	0	0	0	0	0	1	0	0	0	1	1
1	GG	G	G	1	0	GG	G	G	1	0	0	0	CC	C	C	1	0	0	0	46	0	12	1	0	0	3	1	0	0	0	1	0	1	0	1	0	0	50	0	0	0	0	0	0	0	0	0	1	0
1	GG	G	G	1	0	GA	G	A	0	1	0	1	CT	C	T	0	1	0	1	38	0	11	0	0	0	3	1	0	0	1	1	0	1	1	0	0	0	25	1	0	0	0	0	0	0	0	0	1	0
1	GG	G	G	1	0	GG	G	G	1	0	0	0	CT	C	T	0	1	0	1	51	1	12	1	0	1	2	0	0	0	0	1	1	0	0	1	0	0	25	0	1	0	0	1	0	0	0	0	0	0
1	GG	G	G	1	0	GG	G	G	1	0	0	0	CC	C	C	1	0	0	0	36	0	12	0	0	0	1	0	0	0	0	1	0	0	0	0	0	1	50	0	0	0	0	0	0	0	0	0	0	0
1	GG	G	G	1	0	GG	G	G	1	0	0	0	CT	C	T	0	1	0	1	48	0	9	0	1	0	4	1	0	0	0	1	0	0	0	0	1	0	90	0	0	0	0	0	0	0	0	1	0	1
1	GG	G	G	1	0	GG	G	G	1	0	0	0	CC	C	C	1	0	0	0	30	0	15	0	1	1	2	0	0	0	0	1	1	0	1	0	0	0	10	1	0	0	0	0	0	0	0	0	1	0
1	GG	G	G	1	0	GG	G	G	1	0	0	0	CC	C	C	1	0	0	0	59	1	13	1	0	0	3	1	0	0	0	1	0	1	1	0	0	0	20	0	1	0	0	1	0	0	0	0	0	0
1	GG	G	G	1	0	GA	G	A	0	1	0	1	CT	C	T	0	1	0	1	35	0	11	0	0	0	2	0	0	0	1	1	0	0	1	0	0	0	5	0	0	0	0	0	0	0	0	0	1	0
1	GG	G	G	1	0	GG	G	G	1	0	0	0	CC	C	C	1	0	0	0	69	1	12	1	0	0	2	0	0	0	0	0	1	0	0	0	0	1	90	0	1	0	0	1	0	0	1	0	0	0
1	GG	G	G	1	0	GG	G	G	1	0	0	0	CC	C	C	1	0	0	0	46	0	13	0	0	0	3	1	0	0	0	1	1	0	0	0	0	1	80	0	0	1	0	0	0	0	0	0	0	0
1	GG	G	G	1	0	GA	G	A	0	1	0	1	CT	C	T	0	1	0	1	62	1	12	1	0	0	2	0	0	0	0	1	0	0	1	0	0	0	30	0	1	0	0	1	1	0	0	0	0	0
1	GG	G	G	1	0	GG	G	G	1	0	0	0	CT	C	T	0	1	0	1	38	0	12	0	0	0	2	0	2	0	0	1	1	0	1	0	0	0	10	0	0	0	0	0	0	0	0	0	0	0
1	GG	G	G	1	0	GG	G	G	1	0	0	0	CC	C	C	1	0	0	0	63	1	15	1	1	0	3	1	0	1	0	1	0	1	0	1	0	0	57	0	0	0	0	0	1	0	0	0	0	0
1	GG	G	G	1	0	GG	G	G	1	0	0	0	TT	T	T	0	0	1	1	39	0	12	0	0	0	4	1	0	0	0	0	0	0	0	0	0	1	80	1	0	0	0	0	0	0	0	1	0	0
1	GG	G	G	1	0	GG	G	G	1	0	0	0	CC	C	C	1	0	0	0	52	1	11	1	0	0	2	0	0	0	0	0	0	0	1	0	0	0	10	0	1	0	0	1	1	0	0	0	0	0
1	GG	G	G	1	0	GG	G	G	1	0	0	0	CT	C	T	0	1	0	1	49	0	13	0	0	0	2	0	0	0	1	1	0	0	0	0	1	0	70	0	0	0	0	0	0	0	0	0	0	0
1	GG	G	G	1	0	GG	G	G	1	0	0	0	CC	C	C	1	0	0	0	65	1	12	1	0	0	4	1	0	0	0	1	0	0	0	0	1	0	35	0	0	0	0	0	0	0	0	1	0	1
1	GG	G	G	1	0	GG	G	G	1	0	0	0	CT	C	T	0	1	0	1	73	1	10	1	0	0	2	0	0	1	0	0	0	1	0	0	0	1	60	1	0	0	0	0	1	0	0	0	1	0
1	GG	G	G	1	0	GA	G	A	0	1	0	1	CC	C	C	1	0	0	0	64	1	12	1	0	0	2	0	1	0	1	1	0	0	0	1	0	0	35	1	0	0	0	0	1	0	0	0	0	0
1	GG	G	G	1	0	GG	G	G	1	0	0	0	TT	T	T	0	0	1	1	66	1	14	1	0	0	3	1	0	0	1	0	1	0	0	1	0	0	70	0	0	0	1	1	1	0	0	0	1	0
1	GG	G	G	1	0	GA	G	A	0	1	0	1	CT	C	T	0	1	0	1	50	1	13	1	0	0	2	0	0	0	0	0	1	0	0	0	1	0	50	0	0	1	0	1	0	0	1	0	0	0
1	GG	G	G	1	0	GG	G	G	1	0	0	0	CC	C	C	1	0	0	0	45	0	13	0	0	0	3	1	0	0	0	1	0	0	0	1	0	0	60	0	1	0	0	1	1	1	0	0	0	0
1	GG	G	G	1	0	GA	G	A	0	1	0	1	CC	C	C	1	0	0	0	36	0	14	0	0	0	2	0	0	0	0	0	0	0	0	1	0	0	50	0	0	1	0	1	0	0	0	0	1	0
1	GA	G	A	0	1	GG	G	G	1	0	0	0	CC	C	C	1	0	0	0	62	1	17	0	0	0	3	1	0	1	0	0	0	1	1	0	0	0	10	0	0	0	0	0	1	1	0	0	0	0
1	GG	G	G	1	0	GA	G	A	0	1	0	1	TT	T	T	0	0	1	1	48	0	11	0	0	0	1	0	0	0	0	1	1	0	1	0	0	0	10	1	0	0	0	0	0	0	1	0	1	0
1	GG	G	G	1	0	GG	G	G	1	0	0	0	CC	C	C	1	0	0	0	41	0	9	0	0	0	3	1	0	0	0	1	1	0	0	1	0	0	67	0	0	0	0	0	0	0	1	0	0	0
1	GG	G	G	1	0	GG	G	G	1	0	0	0	CC	C	C	1	0	0	0	52	1	15	1	0	0	2	0	0	0	1	1	0	0	0	0	0	1	90	1	0	0	0	0	0	0	0	0	1	0
1	GG	G	G	1	0	GG	G	G	1	0	0	0	CC	C	C	1	0	0	0	40	0	8	0	0	0	3	1	0	1	0	1	0	1	0	0	0	1	20	0	0	0	0	0	1	0	0	0	1	0
1	GG	G	G	1	0	GG	G	G	1	0	0	0	CT	C	T	0	1	0	1	34	0	13	0	1	0	1	0	0	0	0	1	0	0	1	0	0	0	10	0	0	1	0	1	0	0	0	0	1	0
1	GG	G	G	1	0	GG	G	G	1	0	0	0	TT	T	T	0	0	1	1	34	0	14	0	0	0	2	0	1	1	0	1	0	1	0	0	0	1	80	0	1	0	0	1	1	0	0	0	1	0
1	GG	G	G	1	0	GG	G	G	1	0	0	0	CC	C	C	1	0	0	0	54	1	12	1	0	0	3	1	0	0	1	1	1	0	0	1	0	0	40	0	0	0	0	0	1	0	0	0	1	0
1	GG	G	G	1	0	GA	G	A	0	1	0	1	TT	T	T	0	0	1	1	39	0	12	0	0	0	3	1	0	0	1	1	0	0	1	0	0	0	70	0	1	0	0	1	1	0	1	0	0	0
1	GG	G	G	1	0	GG	G	G	1	0	0	0	CC	C	C	1	0	0	0	46	0	15	0	0	0	4	1	0	0	0	0	1	0	1	0	0	0	20	0	0	0	0	0	1	0	0	1	0	1
1	GG	G	G	1	0	GG	G	G	1	0	0	0	CC	C	C	1	0	0	0	62	1	13	0	0	1	3	1	0	0	1	1	0	0	1	0	0	0	20	0	1	0	0	1	0	0	0	0	1	0
1	GG	G	G	1	0	GG	G	G	1	0	0	0	CC	C	C	1	0	0	0	54	1	12	1	0	0	4	1	0	0	0	1	0	0	0	0	1	0	40	0	1	0	0	1	1	0	0	1	0	1
1	GG	G	G	1	0	GA	G	A	0	1	0	1	CT	C	T	0	1	0	1	43	0	13	0	0	0	2	0	0	0	0	1	0	0	1	0	0	0	20	0	1	0	0	1	0	0	0	0	0	0
1	GG	G	G	1	0	GG	G	G	1	0	0	0	CT	C	T	0	1	0	1	46	0	12	0	0	0	3	1	0	0	0	1	1	0	0	1	0	0	71	1	0	0	0	0	1	0	0	0	1	0
1	GG	G	G	1	0	GG	G	G	1	0	0	0	CC	C	C	1	0	0	0	73	1	12	1	0	0	2	0	0	0	1	1	1	0	0	1	0	0	35	0	0	0	0	0	0	0	0	0	1	0
1	GG	G	G	1	0	GG	G	G	1	0	0	0	CT	C	T	0	1	0	1	40	0	13	0	0	1	3	1	0	0	1	1	1	0	1	0	0	0	20	1	0	0	0	0	1	0	0	0	1	0
1	GG	G	G	1	0	GG	G	G	1	0	0	0	TT	T	T	0	0	1	1	52	1	15	1	0	0	4	1	0	0	0	1	0	1	0	1	0	0	70	1	0	0	0	0	0	1	0	1	0	1
1	GG	G	G	1	0	GG	G	G	1	0	0	0	CT	C	T	0	1	0	1	33	0	12	0	1	0	3	1	0	1	0	1	0	1	1	0	0	0	20	0	0	0	0	0	0	0	0	0	0	0
1	GG	G	G	1	0	GG	G	G	1	0	0	0	CC	C	C	1	0	0	0	40	0	8	0	0	0	3	1	0	1	0	1	0	1	0	0	0	1	20	0	0	0	0	0	1	0	0	0	1	0
1	GG	G	G	1	0	GG	G	G	1	0	0	0	TT	T	T	0	0	1	1	37	0	11	0	0	0	3	1	0	1	0	1	0	1	0	0	0	1	70	0	0	1	0	1	0	0	0	0	1	0
1	GG	G	G	1	0	GG	G	G	1	0	0	0	CC	C	C	1	0	0	0	55	1	15	1	0	0	3	1	0	0	1	0	1	0	0	0	1	0	15	1	0	0	0	0	0	0	0	0	1	0
1	GG	G	G	1	0	GA	G	A	0	1	0	1	CC	C	C	1	0	0	0	60	1	11	1	0	0	2	0	0	0	0	0	1	0	1	0	0	0	15	0	1	0	0	1	1	0	0	0	1	0
1	GG	G	G	1	0	GG	G	G	1	0	0	0	CC	C	C	1	0	0	0	42	0	13	0	0	1	3	1	0	0	1	1	1	0	1	0	0	0	20	1	0	0	0	0	1	0	0	0	1	0
1	GG	G	G	1	0	GG	G	G	1	0	0	0	CC	C	C	1	0	0	0	58	1	12	1	1	1	1	0	0	0	0	1	1	0	0	1	0	0	30	0	0	0	1	1	0	0	0	0	1	0
1	GG	G	G	1	0	GG	G	G	1	0	0	0	CT	C	T	0	1	0	1	46	0	15	0	1	1	3	1	0	0	0	1	1	0	1	0	0	0	20	0	0	0	0	0	0	0	0	0	1	0
1	GG	G	G	1	0	GG	G	G	1	0	0	0	CC	C	C	1	0	0	0	62	1	13	1	1	1	3	1	0	0	1	1	1	0	1	0	0	0	20	1	0	0	0	0	0	0	0	0	1	0
1	GG	G	G	1	0	GA	G	A	0	1	0	1	CT	C	T	0	1	0	1	55	1	12	1	1	1	3	1	0	0	0	1	1	0	0	1	0	0	75	1	0	0	0	0	1	0	0	0	1	0
1	GG	G	G	1	0	GG	G	G	1	0	0	0	CC	C	C	1	0	0	0	52	1	15	1	1	0	3	1	0	0	0	1	0	1	0	1	0	0	30	0	0	1	0	1	0	0	1	0	0	0
1	GG	G	G	1	0	GG	G	G	1	0	0	0	TT	T	T	0	0	1	1	40	0	12	0	0	1	4	1	0	0	0	1	1	0	0	0	0	1	70	1	0	0	0	0	0	0	0	1	0	1
1	GG	G	G	1	0	GG	G	G	1	0	0	0	CC	C	C	1	0	0	0	61	1	12	1	0	0	4	1	0	1	0	1	0	1	1	0	0	0	25	0	0	0	0	0	0	0	0	1	0	1
1	GG	G	G	1	0	GA	G	A	0	1	0	1	CC	C	C	1	0	0	0	45	0	9	0	1	1	2	0	0	0	0	0	0	1	1	0	0	0	15	1	0	0	0	0	0	0	0	0	1	0
1	GG	G	G	1	0	GG	G	G	1	0	0	0	CC	C	C	1	0	0	0	38	0	12	0	0	0	3	1	0	0	0	1	0	1	0	0	1	0	30	0	1	0	0	1	1	0	1	0	0	0
1	GG	G	G	1	0	GG	G	G	1	0	0	0	CC	C	C	1	0	0	0	47	0	13	0	1	0	2	0	0	0	1	0	1	0	0	1	0	0	80	0	1	0	0	1	0	0	0	0	1	0
1	GG	G	G	1	0	GG	G	G	1	0	0	0	CT	C	T	0	1	0	1	31	0	15	0	0	0	3	1	0	0	0	1	1	0	0	1	0	0	35	1	0	0	0	0	1	0	0	0	1	0
1	GG	G	G	1	0	GA	G	A	0	1	0	1	CT	C	T	0	1	0	1	55	1	12	1	0	0	4	1	0	0	0	1	1	0	0	0	1	0	80	0	1	0	0	1	1	0	0	1	0	1
1	GG	G	G	1	0	GG	G	G	1	0	0	0	CT	C	T	0	1	0	1	39	0	13	0	1	0	3	1	0	0	0	1	1	0	0	1	0	0	40	0	0	0	0	0	0	0	0	0	1	0
1	GG	G	G	1	0	GA	G	A	0	1	0	1	CT	C	T	0	1	0	1	59	1	13	1	0	0	3	1	0	0	0	1	1	0	0	1	0	0	15	1	0	0	0	0	0	0	0	0	1	0
1	GG	G	G	1	0	GA	G	A	0	1	0	1	CC	C	C	1	0	0	0	40	0	14	0	0	0	3	1	0	0	1	1	1	0	0	0	0	1	80	0	0	0	0	0	1	0	1	0	0	0
1	GG	G	G	1	0	GG	G	G	1	0	0	0	CC	C	C	1	0	0	0	72	1	15	1	0	0	2	0	0	0	0	1	1	0	0	1	0	0	70	0	0	0	0	0	1	0	0	0	1	0
1	GG	G	G	1	0	GG	G	G	1	0	0	0	CC	C	C	1	0	0	0	66	1	15	1	0	0	3	1	0	0	0	1	1	0	1	0	0	0	15	1	0	0	0	0	1	0	0	0	0	0
1	GG	G	G	1	0	GG	G	G	1	0	0	0	TT	T	T	0	0	1	1	61	1	12	1	0	0	4	1	0	0	0	1	1	0	0	1	0	0	77	1	0	0	0	0	1	0	0	1	1	1
1	GG	G	G	1	0	GG	G	G	1	0	0	0	CC	C	C	1	0	0	0	48	0	12	1	0	0	4	1	0	0	0	1	1	0	0	0	0	1	70	0	1	0	0	1	1	0	0	1	0	1
1	GG	G	G	1	0	GG	G	G	1	0	0	0	CT	C	T	0	1	0	1	42	0	13	0	0	0	3	1	0	0	0	1	1	0	1	0	0	0	10	0	1	0	0	1	0	0	0	0	1	0
1	GG	G	G	1	0	GA	G	A	0	1	0	1	CC	C	C	1	0	0	0	51	1	13	1	0	0	3	1	1	0	0	1	1	0	1	0	0	0	20	1	0	0	0	0	1	0	0	0	1	0
1	GG	G	G	1	0	GG	G	G	1	0	0	0	CC	C	C	1	0	0	0	42	0	12	0	0	1	3	1	0	0	1	1	0	0	0	1	0	0	50	1	0	0	0	0	0	0	0	0	1	0
1	GA	G	A	0	1	GA	G	A	0	1	0	1	CC	C	C	1	0	0	0	47	0	12	0	0	0	4	1	0	0	0	1	0	0	0	0	0	1	70	1	0	0	0	0	1	0	0	1	0	1
1	GG	G	G	1	0	GG	G	G	1	0	0	0	CT	C	T	0	1	0	1	42	0	12	0	0	0	3	1	0	0	1	1	1	0	1	0	0	0	10	0	0	0	0	0	1	0	0	0	1	0
1	GG	G	G	1	0	GG	G	G	1	0	0	0	CC	C	C	1	0	0	0	52	1	14	1	0	0	4	1	0	0	0	1	1	0	0	1	0	0	40	0	0	1	0	1	1	0	0	1	0	1
1	GG	G	G	1	0	GG	G	G	1	0	0	0	CT	C	T	0	1	0	1	68	1	15	1	0	0	4	1	0	0	1	1	0	1	1	0	0	0	15	0	0	1	0	1	0	0	0	1	0	1
1	GG	G	G	1	0	GG	G	G	1	0	0	0	CT	C	T	0	1	0	1	40	0	12	0	0	1	4	1	0	0	0	1	1	0	0	0	0	1	70	1	0	0	0	0	0	0	0	1	0	1
1	GG	G	G	1	0	GG	G	G	1	0	0	0	CT	C	T	0	1	0	1	45	0	13	1	0	0	4	1	0	0	0	1	1	0	1	0	0	0	10	0	0	0	0	0	1	0	0	1	0	1
1	GG	G	G	1	0	GA	G	A	0	1	0	1	CT	C	T	0	1	0	1	69	1	11	1	0	1	4	1	0	0	1	0	0	0	1	0	0	0	10	1	0	0	0	0	1	0	0	1	0	1
1	GG	G	G	1	0	GG	G	G	1	0	0	0	CC	C	C	1	0	0	0	63	1	14	1	1	1	2	0	0	0	1	1	0	0	1	0	0	0	10	0	1	0	0	0	0	0	0	0	1	0
1	GG	G	G	1	0	GG	G	G	1	0	0	0	CC	C	C	1	0	0	0	46	0	9	0	1	1	2	0	0	0	0	0	0	1	1	0	0	0	15	1	0	0	0	0	0	0	0	0	1	0
1	GG	G	G	1	0	GG	G	G	1	0	0	0	CC	C	C	1	0	0	0	44	0	11	0	1	1	2	0	0	0	0	1	0	0	0	1	0	0	30	0	0	0	0	0	0	0	1	0	0	0
1	GG	G	G	1	0	GA	G	A	0	1	0	1	CT	C	T	0	1	0	1	56	1	12	1	1	1	1	0	0	0	0	1	1	0	1	0	0	0	25	0	0	0	0	0	0	0	0	0	1	0
1	GG	G	G	1	0	GG	G	G	1	0	0	0	TT	T	T	0	0	1	1	48	0	16	0	0	1	3	1	0	0	1	0	1	0	1	0	0	0	25	1	0	0	0	0	0	0	0	0	1	0
1	GG	G	G	1	0	GG	G	G	1	0	0	0	CT	C	C	0	1	0	1	48	0	15	0	0	0	2	0	0	0	0	1	1	0	1	0	0	0	10	1	0	0	0	0	0	0	0	0	1	0
1	GG	G	G	1	0	GA	G	A	0	1	0	1	CC	C	C	1	0	0	0	62	1	13	1	1	1	2	0	0	0	0	0	0	0	0	0	0	1	75	0	0	1	0	1	0	0	0	0	1	0
1	GG	G	G	1	0	GG	G	G	1	0	0	0	CC	C	C	1	0	0	0	56	1	11	1	1	1	2	0	0	0	0	1	0	0	0	0	0	1	90	1	0	0	0	0	0	0	0	0	1	0
1	GG	G	G	1	0	GG	G	G	1	0	0	0	CC	C	C	1	0	0	0	45	0	15	1	1	1	3	1	0	0	0	1	0	0	0	1	0	0	69	0	0	0	0	0	0	0	0	0	1	0
1	GG	G	G	1	0	GG	G	G	1	0	0	0	CC	C	C	1	0	0	0	48	0	11	0	1	0	3	1	0	0	0	1	1	0	1	0	0	0	15	0	1	0	0	1	1	0	0	0	1	0
1	GG	G	G	1	0	GA	G	A	0	1	0	1	CT	C	T	0	1	0	1	54	1	11	1	1	1	2	0	0	0	0	1	0	1	1	0	0	0	10	0	0	0	0	0	0	0	0	0	1	0
1	GG	G	G	1	0	GA	G	A	0	1	0	1	CT	C	T	0	1	0	1	51	1	10	0	0	0	3	1	0	0	1	1	1	0	0	0	0	1	80	0	1	0	0	1	0	0	0	0	1	0
1	GG	G	G	1	0	GG	G	G	1	0	0	0	CT	C	T	0	1	0	1	42	0	15	0	0	1	3	1	0	1	0	1	0	1	0	1	0	0	75	0	0	0	0	0	0	0	0	0	1	0
1	GG	G	G	1	0	GG	G	G	1	0	0	0	CT	C	T	0	1	0	1	54	1	14	1	1	1	4	1	0	0	1	1	0	1	1	0	0	0	15	1	0	0	0	0	0	0	0	1	0	1
1	GG	G	G	1	0	GG	G	G	1	0	0	0	TT	T	T	0	0	1	1	40	0	15	0	0	1	3	1	0	0	0	1	0	0	0	0	1	0	35	0	0	0	0	0	0	0	0	0	1	0
1	GG	G	G	1	0	GG	G	G	1	0	0	0	CC	C	C	1	0	0	0	72	1	14	1	1	1	3	1	0	0	0	0	0	0	1	0	0	0	35	0	1	0	0	1	0	0	0	0	1	0
1	GG	G	G	1	0	GG	G	G	1	0	0	0	CC	C	C	1	0	0	0	46	0	16	0	0	0	2	0	0	0	1	1	0	0	1	0	0	0	20	0	1	0	0	1	0	0	0	0	1	0
1	GG	G	G	1	0	GG	G	G	1	0	0	0	CT	C	T	0	1	0	1	39	0	11	0	0	0	4	1	1	0	0	1	0	0	0	0	0	1	90	0	1	0	0	1	1	0	0	1	0	1
1	GG	G	G	1	0	GG	G	G	1	0	0	0	CC	C	C	1	0	0	0	78	1	10	0	1	0	3	1	0	0	1	1	0	1	0	0	0	1	70	0	1	0	0	1	1	0	0	0	1	0
1	GG	G	G	1	0	GG	G	G	1	0	0	0	CT	C	T	0	1	0	1	69	1	14	1	0	1	4	1	0	0	1	1	1	0	1	0	0	0	15	0	0	0	0	0	1	0	0	1	1	1
1	GG	G	G	1	0	GG	G	G	1	0	0	0	CT	C	T	0	1	0	1	57	1	13	1	0	0	4	1	0	0	0	1	1	0	1	0	0	0	25	0	1	0	0	1	0	0	1	0	0	1
1	GG	G	G	1	0	GG	G	G	1	0	0	0	TT	T	T	0	0	1	1	48	0	14	0	0	0	2	0	0	0	0	1	1	0	0	1	0	0	27	0	1	0	0	1	0	0	0	0	1	1
1	GG	G	G	1	0	GG	G	G	1	0	0	0	CT	C	T	0	1	0	1	62	1	13	1	0	1	1	0	0	0	1	0	1	0	0	1	0	0	25	0	1	0	0	1	0	0	0	0	1	0
1	GG	G	G	1	0	GG	G	G	1	0	0	0	CT	C	T	0	1	0	1	54	1	13	1	0	1	3	1	0	0	0	1	0	0	0	1	0	0	20	0	0	0	0	0	0	0	1	0	0	0
1	GG	G	G	1	0	GG	G	G	1	0	0	0	TT	T	T	0	0	1	0	65	1	14	1	0	0	1	0	0	0	1	1	0	1	1	0	0	0	15	0	0	0	1	0	1	0	0	0	1	0
1	GG	G	G	1	0	GG	G	G	1	0	0	0	CC	C	C	1	0	0	0	48	0	8	0	1	0	2	0	1	0	0	1	1	0	1	0	0	0	10	0	0	0	0	0	0	0	0	0	1	0
1	GG	G	G	1	0	GG	G	G	1	0	0	0	CC	C	C	1	0	0	0	53	1	10	1	0	0	2	0	0	0	0	1	0	1	0	0	0	1	80	0	0	1	0	1	0	0	0	0	1	0
1	GG	G	G	1	0	GG	G	G	1	0	0	0	CC	C	C	1	0	0	0	45	0	13	0	0	0	3	1	0	0	0	1	0	1	0	0	0	1	75	0	0	0	0	0	1	0	0	0	1	0
1	GG	G	G	1	0	GG	G	G	1	0	0	0	TT	T	T	0	0	1	1	53	1	12	1	0	0	3	1	0	0	1	0	1	0	1	0	0	0	20	0	0	0	0	0	1	0	1	0	0	0
1	GG	G	G	1	0	GG	G	G	1	0	0	0	CC	C	C	1	0	0	0	32	0	12	0	0	0	3	1	0	0	0	1	1	0	0	0	0	1	80	0	1	0	0	1	1	0	1	0	0	0
1	GG	G	G	1	0	GG	G	G	1	0	0	0	CC	C	C	1	0	0	0	56	1	14	1	1	0	2	0	0	0	0	1	0	1	0	1	0	0	30	0	1	0	0	1	0	0	0	0	1	0
1	GG	G	G	1	0	GG	G	G	1	0	0	0	CT	C	T	0	1	0	1	32	0	13	0	1	1	2	0	0	0	1	1	1	0	1	0	0	0	20	0	0	0	0	0	1	0	0	0	1	0
1	GG	G	G	1	0	GG	G	G	1	0	0	0	CT	C	T	0	1	0	1	41	0	12	0	1	0	2	0	0	0	0	1	1	0	0	0	0	1	70	0	1	0	0	1	0	0	1	0	0	0
1	GG	G	G	1	0	GG	G	G	1	0	0	0	CT	C	T	0	1	0	1	69	1	13	1	0	0	3	1	0	0	0	1	0	0	1	0	0	0	25	0	0	0	0	0	1	0	0	0	1	0
1	GG	G	G	1	0	GG	G	G	1	0	0	0	TT	T	T	0	0	1	1	40	0	11	0	1	1	2	0	0	0	0	1	1	0	1	0	0	0	20	1	0	0	0	0	1	0	0	0	1	0
1	GG	G	G	1	0	GG	G	G	1	0	0	0	CC	C	C	1	0	0	0	56	1	15	1	0	0	3	1	0	0	0	1	1	0	1	0	0	0	20	0	1	0	0	1	1	0	0	0	1	0
1	GG	G	G	1	0	GA	G	A	0	1	0	1	CT	C	T	0	1	0	1	58	1	14	1	0	0	2	0	0	0	1	1	0	1	1	0	0	0	15	1	0	0	0	0	0	0	1	0	0	0
1	GG	G	G	1	0	GG	G	G	1	0	0	0	TT	T	T	0	0	1	1	48	0	13	1	0	0	3	1	0	0	0	1	1	0	1	0	0	0	10	0	0	0	0	0	1	0	0	0	1	0
1	GG	G	G	1	0	GG	G	G	1	0	0	0	CT	C	T	0	1	0	1	48	0	11	0	1	1	2	0	0	0	0	1	0	0	0	1	0	0	25	1	0	0	0	0	0	0	1	0	0	0
1	GG	G	G	1	0	GG	G	G	1	0	0	0	TT	T	T	0	0	1	1	42	0	11	0	0	1	1	0	0	0	1	1	0	1	0	0	0	1	60	1	0	0	0	0	0	0	0	0	1	0
1	GG	G	G	1	0	GG	G	G	1	0	0	0	CC	C	C	1	0	0	0	68	1	14	1	1	1	3	1	0	0	1	0	1	0	1	0	0	0	25	0	0	1	0	1	1	0	0	0	1	0
1	GG	G	G	1	0	GG	G	G	1	0	0	0	CT	C	T	0	1	0	1	50	1	13	1	0	0	2	0	0	0	0	1	0	0	1	0	0	0	10	0	0	1	0	1	1	0	0	0	1	1
1	GG	G	G	1	0	GG	G	G	1	0	0	0	CT	C	T	0	1	0	1	71	1	13	1	1	1	2	0	0	0	1	1	0	1	1	0	0	0	25	0	0	0	0	0	1	0	0	0	1	0
1	GG	G	G	1	0	GG	G	G	1	0	0	0	TT	T	T	0	0	1	1	74	1	13	1	0	1	3	1	0	0	0	1	0	0	0	0	0	1	70	1	0	0	0	0	1	0	0	0	1	0
1	GG	G	G	1	0	GA	G	A	0	1	0	1	CT	C	T	0	1	0	1	41	0	13	0	1	0	3	1	0	0	0	1	0	0	0	0	0	1	50	1	0	0	0	0	1	0	1	0	0	0
1	GG	G	G	1	0	GG	G	G	1	0	0	0	CC	C	C	1	0	0	0	60	1	13	1	0	0	4	1	0	0	0	1	0	0	0	0	1	0	25	0	0	1	0	1	1	0	1	1	0	1
1	GG	G	G	1	0	GG	G	G	1	0	0	0	CC	C	C	1	0	0	0	63	1	13	1	1	0	3	1	0	0	1	1	0	0	0	0	0	1	25	0	1	0	0	1	1	0	0	0	1	0
1	GG	G	G	1	0	GG	G	G	1	0	0	0	CC	C	C	1	0	0	0	39	0	12	0	0	0	4	1	0	0	0	1	1	0	0	0	0	1	40	0	0	0	0	0	1	0	0	1	0	1
1	GG	G	G	1	0	GG	G	G	1	0	0	0	CC	C	C	1	0	0	0	32	0	12	0	1	1	4	1	1	0	0	1	0	1	0	0	1	0	35	0	0	0	0	0	1	0	0	1	0	1
1	GG	G	G	1	0	GG	G	G	1	0	0	0	CT	C	T	0	1	0	1	54	1	7	1	0	0	3	1	0	0	1	1	0	1	0	0	1	0	20	0	0	1	0	1	1	0	0	0	1	0
1	GG	G	G	1	0	GG	G	G	1	0	0	0	CT	C	T	0	1	0	1	73	1	11	1	0	0	3	1	0	0	0	1	0	1	1	0	0	0	25	1	0	0	0	0	1	0	0	0	1	0
1	GG	G	G	1	0	GG	G	G	1	0	0	0	CC	C	C	1	0	0	0	54	1	12	1	1	0	2	0	0	0	1	1	1	0	0	0	0	1	60	0	1	0	0	1	1	0	0	0	1	0
1	GG	G	G	1	0	GG	G	G	1	0	0	0	CT	C	T	0	1	0	1	58	1	13	1	0	0	3	1	0	0	1	1	0	0	1	0	0	0	25	0	0	0	0	0	1	0	0	0	1	0
1	GG	G	G	1	0	GG	G	G	1	0	0	0	CC	C	C	1	0	0	0	66	1	15	1	1	1	1	0	0	0	0	1	0	0	0	0	1	0	30	0	0	0	0	0	0	0	1	0	0	0
1	GG	G	G	1	0	GG	G	G	1	0	0	0	CT	C	T	0	1	0	1	74	1	12	1	1	0	2	0	0	0	1	0	0	0	0	0	1	0	60	0	1	0	0	1	0	0	1	0	0	0
1	GG	G	G	1	0	GG	G	G	1	0	0	0	CT	C	T	0	1	0	1	45	0	12	1	0	0	4	1	0	0	0	1	1	0	0	0	1	0	25	0	1	0	0	1	1	0	1	1	0	1
1	GG	G	G	1	0	GG	G	G	1	0	0	0	CT	C	T	0	1	0	1	49	0	13	1	0	0	3	1	0	0	0	1	0	1	1	0	0	0	20	0	0	0	0	0	0	0	1	0	0	0
1	GG	G	G	1	0	GG	G	G	1	0	0	0	CC	C	C	1	0	0	0	46	0	15	0	0	0	2	0	0	0	1	1	0	1	0	0	1	0	10	1	0	0	0	0	0	0	0	0	1	0
1	GG	G	G	1	0	GG	G	G	1	0	0	0	CT	C	T	0	1	0	1	44	0	12	0	0	0	3	1	0	0	0	1	0	1	0	1	0	0	30	0	0	0	0	0	1	0	1	0	0	0
1	GG	G	G	1	0	GG	G	G	1	0	0	0	CT	C	T	0	1	0	1	44	0	11	0	0	0	3	1	0	0	0	1	1	0	1	0	0	0	20	0	1	0	0	1	0	0	0	0	1	0
1	GG	G	G	1	0	GA	G	A	0	1	0	1	CC	C	C	1	0	0	0	48	0	12	0	0	1	2	0	0	0	1	1	0	0	0	1	0	0	30	0	1	0	0	1	1	0	0	0	1	0
1	GG	G	G	1	0	GG	G	G	1	0	0	0	CC	C	C	1	0	0	0	32	0	11	0	1	1	4	1	0	0	0	1	1	0	0	1	0	0	50	0	0	1	0	1	1	0	1	1	0	1
1	GG	G	G	1	0	GG	G	G	1	0	0	0	CC	C	C	1	0	0	0	51	1	11	1	1	0	4	1	0	0	0	1	0	0	0	1	0	0	15	0	0	0	0	0	0	0	1	1	0	1
1	GG	G	G	1	0	GG	G	G	1	0	0	0	CC	C	C	1	0	0	0	46	0	12	0	1	0	3	1	0	0	0	1	1	0	1	0	0	0	20	1	0	0	0	0	0	0	1	0	0	0
1	GG	G	G	1	0	GG	G	G	1	0	0	0	TT	T	T	0	0	1	1	52	1	17	1	0	0	3	1	0	0	0	1	1	0	0	1	0	0	77	1	0	0	0	0	0	0	1	0	0	0
1	GG	G	G	1	0	GG	G	G	1	0	0	0	CT	C	T	0	1	0	1	50	1	14	1	0	1	4	1	0	0	1	1	0	0	0	0	1	0	50	0	1	0	0	1	0	0	0	1	0	1
1	GG	G	G	1	0	GG	G	G	1	0	0	0	CT	C	T	0	1	0	1	43	0	11	0	0	1	2	0	0	0	0	1	1	0	0	0	1	0	70	0	0	0	0	0	1	0	0	0	1	0
1	GG	G	G	1	0	GA	G	A	0	1	0	1	CT	C	T	0	1	0	1	25	0	13	0	1	1	4	1	0	0	0	1	1	0	0	0	0	1	45	0	0	0	0	0	0	0	0	1	0	1
1	GG	G	G	1	0	GA	G	A	0	1	0	1	CT	C	T	0	1	0	1	60	1	14	1	0	0	4	1	0	0	1	1	0	1	0	0	0	1	70	1	0	0	0	0	1	0	0	1	0	1
1	GG	G	G	1	0	GG	G	G	1	0	0	0	CC	C	C	1	0	0	0	59	1	10	1	0	1	2	0	0	0	0	1	0	1	0	0	1	0	73	0	1	0	0	1	0	0	0	0	1	0
1	GG	G	G	1	0	GG	G	G	1	0	0	0	CC	C	C	1	0	0	0	49	0	12	1	0	0	2	0	0	0	0	1	1	0	0	1	0	0	30	0	0	0	0	0	0	0	0	0	1	0
1	GG	G	G	1	0	GG	G	G	1	0	0	0	CT	C	T	0	1	0	1	63	1	10	1	0	1	4	1	0	1	1	0	0	1	1	0	0	0	25	0	1	0	0	1	1	0	0	1	0	1
1	GG	G	G	1	0	GG	G	G	1	0	0	0	CC	C	C	1	0	0	0	41	0	13	0	0	0	2	0	0	0	0	1	0	0	1	0	0	0	10	0	0	0	0	0	0	0	0	0	1	0
1	GG	G	G	1	0	GG	G	G	1	0	0	0	CC	C	C	1	0	0	0	42	0	13	0	0	0	4	1	0	0	0	0	1	0	1	0	0	0	5	0	0	1	0	1	1	0	0	1	0	1
1	GG	G	G	1	0	GG	G	G	1	0	0	0	CT	C	T	0	1	0	1	66	1	12	1	0	0	4	1	0	0	0	0	1	0	1	0	0	0	30	0	0	1	0	1	1	0	0	1	0	1
1	GG	G	G	1	0	GG	G	G	1	0	0	0	CT	C	T	0	1	0	1	63	1	12	1	0	1	4	1	1	0	1	1	0	0	0	1	0	0	95	0	0	0	0	0	0	0	0	1	0	1
1	GG	G	G	1	0	GG	G	G	1	0	0	0	CC	C	C	1	0	0	0	30	0	12	0	0	0	3	1	0	0	0	1	0	0	0	0	0	1	45	0	1	0	0	1	1	0	0	1	0	1
1	GG	G	G	1	0	GG	G	G	1	0	0	0	CT	C	T	0	1	0	1	50	1	12	1	0	1	4	1	0	0	0	1	0	1	0	0	1	0	30	1	0	0	0	0	0	0	0	1	0	1
1	GG	G	G	1	0	GG	G	G	1	0	0	0	CC	C	C	1	0	0	0	56	1	11	1	0	0	2	0	0	0	0	1	1	0	0	1	0	0	35	0	0	0	0	0	1	0	0	0	0	0
1	GG	G	G	1	0	GG	G	G	1	0	0	0	TT	T	T	0	0	1	1	46	0	13	0	0	0	3	1	0	0	0	1	1	0	0	0	1	0	50	1	0	0	0	0	0	0	0	0	1	0
1	GG	G	G	1	0	GG	G	G	1	0	0	0	CC	C	C	1	0	0	0	55	1	15	1	0	0	2	0	0	0	1	0	1	0	0	1	0	0	40	1	0	0	0	0	0	0	0	0	1	0
1	GG	G	G	1	0	GG	G	G	1	0	0	0	CC	C	C	1	0	0	0	49	0	13	1	1	1	2	0	0	0	0	1	1	0	0	1	0	0	30	1	0	0	0	0	1	0	0	0	1	0
1	GG	G	G	1	0	GG	G	G	1	0	0	0	CC	C	C	1	0	0	0	52	1	13	1	0	1	4	1	0	0	0	1	0	1	0	0	1	0	10	1	0	0	0	0	1	0	0	1	0	1
1	GG	G	G	1	0	GG	G	G	1	0	0	0	CC	C	C	1	0	0	0	55	1	14	1	0	0	4	1	0	0	1	1	0	0	0	0	1	0	25	0	0	1	0	1	1	0	0	1	0	1
1	GG	G	G	1	0	GG	G	G	1	0	0	0	TT	T	T	0	0	1	1	44	0	11	0	1	0	3	1	0	0	0	1	1	0	0	0	0	1	40	0	0	0	0	0	0	0	1	0	0	0
1	GG	G	G	1	0	GG	G	G	1	0	0	0	CT	C	T	0	1	0	1	61	1	14	1	0	0	2	0	0	0	0	0	0	0	0	0	0	1	60	0	0	0	0	0	1	0	0	0	1	0
1	GG	G	G	1	0	AA	A	A	0	0	1	1	CT	C	T	0	1	0	1	48	0	13	1	0	0	2	0	0	0	0	1	0	0	0	0	1	0	50	0	1	0	0	1	1	0	0	0	1	0
1	GG	G	G	1	0	GG	G	G	1	0	0	0	CC	C	C	1	0	0	0	62	1	13	1	0	0	2	0	0	1	0	1	0	1	0	1	0	0	10	1	0	0	0	0	1	0	0	0	1	0
1	GG	G	G	1	0	GG	G	G	1	0	0	0	CC	C	C	1	0	0	0	47	0	13	1	0	1	2	0	1	0	0	1	0	0	0	1	0	0	10	0	1	0	0	1	1	0	1	0	0	0
1	GG	G	G	1	0	GG	G	G	1	0	0	0	TT	T	T	0	0	1	1	56	1	12	1	0	0	1	0	0	0	0	1	1	0	0	0	1	0	25	0	1	0	0	1	0	0	0	0	1	0
1	GG	G	G	1	0	GG	G	G	1	0	0	0	CT	C	T	0	1	0	1	48	0	12	1	0	0	2	0	0	1	0	1	0	1	0	0	1	0	10	0	1	0	0	1	1	0	0	0	1	0
1	GG	G	G	1	0	GG	G	G	1	0	0	0	CC	C	C	1	0	0	0	60	1	13	1	0	0	2	0	0	0	1	0	0	0	0	1	0	0	10	0	1	0	0	1	1	0	0	0	1	0
1	GG	G	G	1	0	GG	G	G	1	0	0	0	CT	C	T	0	1	0	1	65	1	11	1	0	0	3	1	0	0	0	1	0	0	1	0	0	0	15	1	0	0	0	0	1	0	1	0	0	0
1	GG	G	G	1	0	GG	G	G	1	0	0	0	CC	C	C	1	0	0	0	44	0	15	0	0	0	2	0	0	0	0	1	1	0	0	1	0	0	15	0	0	1	0	1	0	0	0	0	1	0
1	GG	G	G	1	0	GG	G	G	1	0	0	0	CC	C	C	1	0	0	0	54	1	13	1	0	0	1	0	0	0	0	1	1	0	0	1	0	0	75	1	0	0	0	0	0	0	0	0	1	0
1	GG	G	G	1	0	GG	G	G	1	0	0	0	TT	T	T	0	0	1	1	44	0	15	1	0	0	4	1	0	0	0	1	0	0	0	0	1	0	70	0	1	0	0	1	0	0	0	1	0	1
1	GG	G	G	1	0	GG	G	G	1	0	0	0	CC	C	C	1	0	0	0	63	1	8	1	1	1	3	1	0	0	1	1	0	0	0	0	1	0	45	0	0	0	1	1	1	0	0	1	0	1
1	GG	G	G	1	0	GG	G	G	1	0	0	0	CT	C	T	0	1	0	1	41	0	13	1	0	0	1	0	0	0	0	1	0	0	0	1	0	0	10	1	0	0	0	0	0	0	0	0	1	0
1	GG	G	G	1	0	GG	G	G	1	0	0	0	CC	C	C	1	0	0	0	62	1	12	1	1	1	2	0	1	0	0	1	1	0	0	0	1	0	40	0	1	0	0	1	1	0	1	0	0	0
1	GG	G	G	1	0	GG	G	G	1	0	0	0	CT	C	T	0	1	0	1	62	1	16	1	0	0	4	1	0	0	1	0	0	0	0	1	0	0	10	0	1	0	0	1	1	0	0	0	1	1
1	GG	G	G	1	0	GG	G	G	1	0	0	0	CT	C	T	0	1	0	1	57	1	12	1	1	1	4	1	0	0	0	0	0	0	0	1	0	0	80	0	0	1	0	1	0	0	1	0	1	1
1	GG	G	G	1	0	GG	G	G	1	0	0	0	CT	C	T	0	1	0	1	49	0	12	0	0	0	4	1	0	0	0	1	0	0	0	0	0	1	40	1	0	0	0	0	1	0	1	0	1	1
1	GG	G	G	1	0	GG	G	G	1	0	0	0	CT	C	T	0	1	0	1	62	1	11	1	0	0	3	1	0	0	0	1	1	0	0	1	0	0	40	0	0	1	0	1	1	0	1	0	0	0
1	GG	G	G	1	0	GG	G	G	1	0	0	0	CT	C	T	0	1	0	1	72	1	14	1	0	0	1	0	0	0	1	0	1	0	1	0	0	0	10	1	0	0	0	0	1	0	0	0	1	0
1	GG	G	G	1	0	GG	G	G	1	0	0	0	CT	C	T	0	1	0	1	59	1	12	1	0	0	4	1	0	0	1	1	0	0	0	0	0	1	50	0	1	0	0	1	1	0	0	1	0	1
1	GG	G	G	1	0	GG	G	G	1	0	0	0	CC	C	C	1	0	0	0	60	1	13	1	1	1	2	0	0	0	0	0	1	0	0	0	1	0	40	0	1	0	0	1	0	0	1	0	0	0
1	GG	G	G	1	0	GG	G	G	1	0	0	0	CC	C	C	1	0	0	0	69	1	12	1	0	1	2	0	0	0	1	0	1	0	0	0	0	1	25	1	0	0	0	0	0	0	1	0	0	0
1	GG	G	G	1	0	GG	G	G	1	0	0	0	CT	C	T	0	1	0	1	69	1	12	1	1	0	2	0	0	0	1	1	0	1	0	0	0	1	25	1	0	0	0	0	0	0	0	0	1	0
1	GG	G	G	1	0	GA	G	A	0	1	0	1	CC	C	C	1	0	0	0	60	1	16	0	0	1	2	0	0	0	0	1	0	0	0	1	0	0	75	0	0	1	0	1	0	0	1	0	0	0
1	GG	G	G	1	0	GA	A	A	0	0	1	1	CT	C	T	0	1	0	1	50	1	11	1	1	0	2	0	0	0	0	1	0	0	0	1	0	0	10	0	0	0	1	1	0	0	0	0	1	0
1	GG	G	G	1	0	GG	G	G	1	0	0	0	CC	C	C	1	0	0	0	33	0	11	0	0	1	4	1	0	0	0	1	0	0	0	0	1	0	40	1	0	0	0	1	1	0	0	1	0	1
1	GG	G	G	1	0	GG	G	G	1	0	0	0	CT	C	T	0	1	0	1	31	0	15	0	0	1	3	1	0	0	0	1	1	0	0	0	1	0	60	1	0	0	0	1	1	1	0	0	0	0
1	GG	G	G	1	0	GG	G	G	1	0	0	0	CC	C	C	1	0	0	0	32	0	14	0	0	0	4	1	0	0	1	1	0	0	0	0	1	9	35	1	0	0	0	0	1	1	0	0	0	1
1	GG	G	G	1	0	GA	G	A	0	1	0	1	CT	C	T	0	1	0	1	56	1	13	1	0	0	2	0	0	0	0	1	0	0	1	0	0	0	7	0	0	0	0	0	0	0	0	0	1	0
1	GG	G	G	1	0	GG	G	G	1	0	0	0	CC	C	C	1	0	0	0	43	0	12	0	0	0	1	0	0	0	0	1	1	0	0	0	1	0	50	0	0	0	0	0	0	0	0	0	1	0
1	GG	G	G	1	0	GA	G	A	0	1	0	1	CT	C	T	0	1	0	1	45	0	12	1	0	0	4	1	0	0	0	1	1	0	0	1	0	0	80	0	0	0	0	0	1	0	0	1	0	1
1	GG	G	G	1	0	GG	G	G	1	0	0	0	CC	C	C	1	0	0	0	62	1	13	1	1	0	2	0	0	0	1	0	1	0	0	1	0	0	50	1	0	0	0	0	1	0	1	0	0	0
1	GG	G	G	1	0	GG	G	G	1	0	0	0	CC	C	C	1	0	0	0	39	0	12	0	0	0	2	0	1	0	0	1	0	1	0	1	0	0	20	0	0	0	0	0	1	0	0	0	1	0
1	GG	G	G	1	0	GA	G	A	0	1	0	1	CC	C	C	1	0	0	0	53	1	14	1	0	0	2	0	0	0	0	1	0	1	1	0	0	0	25	0	1	0	0	1	0	0	0	0	1	0
1	GG	G	G	1	0	GG	G	G	1	0	0	0	CC	C	C	1	0	0	0	34	0	14	0	0	0	3	1	0	0	1	0	0	0	0	0	1	0	50	0	0	0	0	0	0	0	0	0	1	0
1	GG	G	G	1	0	GG	G	G	1	0	0	0	CT	C	T	0	1	0	1	51	1	15	1	0	0	3	1	0	0	1	0	1	0	0	0	1	0	55	1	0	0	0	0	1	0	1	0	0	0
1	GG	G	G	1	0	GG	G	G	1	0	0	0	CT	C	T	0	1	0	1	51	1	20	0	0	0	4	1	0	0	0	0	0	0	0	0	1	0	50	0	0	0	0	0	0	0	0	1	0	1
1	GG	G	G	1	0	GG	G	G	1	0	0	0	CT	C	T	0	1	0	1	71	1	15	1	0	0	4	1	0	0	0	1	0	1	0	1	0	0	60	1	0	0	0	0	1	0	0	1	0	1
1	GG	G	G	1	0	GG	G	G	1	0	0	0	CT	C	T	0	1	0	1	49	0	12	1	1	0	3	1	0	0	1	1	0	1	0	0	1	0	25	0	0	0	0	0	0	0	0	0	1	0
1	GG	G	G	1	0	GG	G	G	1	0	0	0	TT	T	T	0	0	1	1	48	0	13	1	0	0	1	0	0	0	1	1	1	0	1	0	0	0	20	1	0	0	0	0	0	0	1	0	0	0
1	GG	G	G	1	0	GG	G	G	1	0	0	0	CC	C	C	1	0	0	0	58	1	12	1	0	1	2	0	0	0	0	0	0	0	0	1	0	0	50	1	0	0	0	0	0	0	0	0	1	0
1	GG	G	G	1	0	GA	G	A	0	1	0	1	CT	C	T	0	1	0	1	57	1	11	1	1	1	2	0	0	1	0	1	0	1	1	0	0	0	25	0	0	0	0	0	0	0	0	0	1	0
1	GG	G	G	1	0	GG	G	G	1	0	0	0	CT	C	T	0	1	0	1	63	1	11	1	0	1	4	1	0	0	1	1	0	0	0	1	0	0	70	0	0	0	1	1	0	0	0	1	0	1
1	GG	G	G	1	0	GA	G	A	0	1	0	1	CT	C	T	0	1	0	1	54	1	12	1	1	0	4	1	0	0	0	1	0	0	0	1	0	0	50	1	0	0	0	0	1	0	0	1	0	1
1	GG	G	G	1	0	GG	G	G	1	0	0	0	CT	C	T	0	1	0	1	39	0	12	0	1	1	2	0	0	0	0	1	1	0	0	0	0	1	80	0	1	0	0	1	0	0	0	0	1	0
1	GG	G	G	1	0	GG	G	G	1	0	0	0	TT	T	T	0	0	1	1	76	1	15	1	0	1	1	0	0	0	1	1	0	0	0	0	1	0	20	0	0	0	0	0	0	0	0	0	1	0
1	GG	G	G	1	0	GA	G	A	0	1	0	1	CT	C	T	0	1	0	1	76	1	12	1	0	0	4	1	0	0	0	1	0	0	0	0	1	0	15	0	1	0	0	1	1	0	0	1	0	1
1	GG	G	G	1	0	GG	G	G	1	0	0	0	CT	C	T	0	1	0	1	53	1	13	1	0	1	2	0	0	0	0	1	1	0	0	1	0	0	10	1	0	0	0	0	1	0	0	0	1	0
1	GG	G	G	1	0	GG	G	G	1	0	0	0	CC	C	C	1	0	0	0	49	0	10	1	0	1	3	1	1	0	0	1	0	0	1	0	0	0	25	0	0	0	0	0	1	0	0	0	1	0
1	GG	G	G	1	0	GG	G	G	1	0	0	0	CT	C	T	0	1	0	1	52	1	14	1	1	0	4	1	0	0	0	1	1	0	0	1	0	0	50	0	0	0	0	0	1	0	0	1	0	1
1	GG	G	G	1	0	GG	G	G	1	0	0	0	CT	C	T	0	1	0	1	55	1	12	1	1	1	4	1	0	0	1	1	1	0	0	0	1	0	20	1	0	0	0	0	0	0	0	1	0	1
1	GG	G	G	1	0	GG	G	G	1	0	0	0	CC	C	C	1	0	0	0	68	1	15	1	0	1	2	0	0	0	0	1	1	0	0	0	1	0	40	1	0	0	0	0	1	0	1	0	0	0
1	GG	G	G	1	0	GA	G	A	0	1	0	1	CC	C	C	1	0	0	0	43	0	12	0	0	1	1	0	0	0	0	0	0	1	1	0	0	0	20	0	0	0	0	0	0	0	1	0	0	0
1	GG	G	G	1	0	GG	G	G	1	0	0	0	CT	C	T	0	1	0	1	72	1	15	1	0	0	2	0	0	0	0	1	0	1	0	1	0	0	80	0	0	0	0	0	1	0	1	0	0	0
1	GG	G	G	1	0	GG	G	G	1	0	0	0	CT	C	T	0	1	0	1	72	1	11	1	0	0	3	1	0	0	0	0	0	0	0	1	0	0	50	0	0	0	0	0	1	0	0	0	1	0
1	GG	G	G	1	0	GA	G	A	0	1	0	1	CC	C	C	1	0	0	0	71	1	14	1	0	0	3	1	0	1	0	1	0	1	0	0	1	0	40	0	1	0	0	1	1	0	0	0	1	0
1	GG	G	G	1	0	GG	G	G	1	0	0	0	CC	C	C	1	0	0	0	49	0	10	0	0	0	4	1	0	1	0	1	0	1	0	1	0	0	20	0	1	0	0	1	0	0	1	0	0	1
1	GG	G	G	1	0	GG	G	G	1	0	0	0	CC	C	C	1	0	0	0	48	0	11	0	0	0	2	0	0	0	0	1	0	0	0	0	1	0	60	0	1	0	0	1	0	0	1	0	0	0
1	GG	G	G	1	0	GG	G	G	1	0	0	0	CC	C	C	1	0	0	0	49	0	12	0	0	0	2	0	0	0	1	1	0	1	0	1	0	0	40	1	0	0	0	0	1	0	1	0	0	0
1	GG	G	G	1	0	GG	G	G	1	0	0	0	CC	C	C	1	0	0	0	33	0	10	0	0	0	3	1	0	0	0	1	0	0	0	0	1	0	60	0	1	0	0	1	0	0	0	0	1	0
1	GG	G	G	1	0	GG	G	G	1	0	0	0	CC	C	C	1	0	0	0	54	1	12	1	0	0	2	0	1	0	0	1	0	0	0	1	0	0	5	0	1	0	0	1	0	0	1	0	0	0
1	GG	G	G	1	0	GA	G	A	0	1	0	1	CC	C	C	1	0	0	0	66	1	14	1	1	0	2	0	0	0	0	0	0	0	0	0	0	1	30	1	0	0	0	0	0	0	1	0	0	0
1	GG	G	G	1	0	GG	G	G	1	0	0	0	CT	C	T	0	1	0	1	56	1	12	1	0	0	4	1	0	0	0	1	0	0	0	1	0	0	40	1	0	0	0	0	1	0	0	1	0	1
1	GG	G	G	1	0	GA	G	A	0	1	0	1	CT	C	T	0	1	0	1	42	0	11	0	1	0	2	0	0	0	1	1	0	1	0	1	0	0	7	0	1	0	0	1	1	0	1	0	0	0
1	GG	G	G	1	0	GG	G	G	1	0	0	0	CC	C	C	1	0	0	0	58	1	14	1	0	1	2	0	0	0	0	0	1	0	0	0	1	0	20	1	0	0	0	0	0	0	0	0	1	0
1	GG	G	G	1	0	GG	G	G	1	0	0	0	CT	C	T	0	1	0	1	74	1	14	1	1	1	4	1	0	0	1	1	0	1	1	0	0	0	20	0	0	0	0	0	1	0	0	1	0	1
1	GG	G	G	1	0	GG	G	G	1	0	0	0	CC	C	C	1	0	0	0	77	1	14	1	0	0	3	1	0	0	1	0	1	0	0	1	0	0	10	0	1	0	0	1	1	0	1	0	0	0
1	GG	G	G	1	0	GG	G	G	1	0	0	0	CC	C	C	1	0	0	0	42	0	15	0	1	0	4	1	0	0	0	1	0	0	0	1	0	0	80	1	0	0	0	0	1	0	1	0	0	1
1	GG	G	G	1	0	GG	G	G	1	0	0	0	CC	C	C	1	0	0	0	41	0	11	0	0	0	3	1	0	0	1	1	0	1	0	1	0	0	70	0	0	0	0	0	0	0	1	0	0	0
1	GG	G	G	1	0	GG	G	G	1	0	0	0	CC	C	C	1	0	0	0	52	1	12	1	1	0	2	0	0	0	0	0	0	1	1	0	0	0	10	0	1	0	0	1	0	0	0	0	1	0
1	GG	G	G	1	0	GG	G	G	1	0	0	0	CT	C	T	0	1	0	1	37	0	14	0	0	0	4	1	0	0	0	1	0	0	0	0	0	1	30	0	0	0	0	0	0	0	0	0	1	1
1	GG	G	G	1	0	GA	G	A	0	1	0	1	CC	C	C	1	0	0	0	53	1	14	1	1	0	4	1	0	0	0	1	0	0	0	0	0	1	38	1	0	0	0	0	0	0	0	1	0	1
1	GG	G	G	1	0	GG	G	G	1	0	0	0	CC	C	C	1	0	0	0	62	1	12	1	0	0	2	0	1	1	0	1	0	1	0	1	0	0	40	0	0	1	0	0	0	0	1	0	0	1
1	GG	G	G	1	0	GG	G	G	1	0	0	0	CT	C	T	0	1	0	1	46	0	10	1	0	0	4	1	0	0	0	1	1	0	0	0	1	0	25	0	0	0	0	0	0	1	0	0	0	1
1	GG	G	G	1	0	GG	G	G	1	0	0	0	CC	C	C	1	0	0	0	61	1	12	1	0	0	4	1	0	0	1	0	1	0	0	1	0	0	10	0	1	0	0	1	0	0	0	0	1	1
1	GG	G	G	1	0	GA	G	A	0	1	0	1	CT	C	T	0	1	0	1	49	0	16	0	1	1	4	1	1	0	0	1	1	0	1	0	0	0	10	1	0	0	0	0	1	0	1	0	0	1
1	GG	G	G	1	0	GG	G	G	1	0	0	0	CC	C	C	1	0	0	0	44	0	14	0	1	1	2	0	0	0	0	1	0	0	0	0	0	1	30	0	0	0	0	0	0	0	0	0	1	0
1	GG	G	G	1	0	GG	G	G	1	0	0	0	CT	C	T	0	1	0	1	69	1	13	1	1	1	4	1	0	0	0	1	0	0	0	0	0	1	40	0	1	0	0	1	1	1	0	0	0	1
1	GG	G	G	1	0	GG	G	G	1	0	0	0	CC	C	C	1	0	0	0	44	0	12	0	0	0	4	1	0	0	1	1	0	0	0	1	0	0	40	0	1	0	0	1	0	1	0	0	0	1
1	GG	G	G	1	0	GG	G	G	1	0	0	0	CT	C	T	0	1	0	1	62	1	12	1	0	0	4	1	1	0	1	0	0	0	0	1	0	0	80	0	0	0	0	0	0	0	0	0	1	1
1	GG	G	G	1	0	GG	G	G	1	0	0	0	TT	T	T	0	0	1	1	68	1	13	1	0	0	4	1	0	0	0	1	0	0	0	0	1	0	30	0	0	0	0	0	0	1	0	0	0	1
1	GG	G	G	1	0	GG	G	G	1	0	0	0	CT	C	T	0	1	0	1	62	1	13	1	0	0	3	1	1	0	0	0	1	0	1	0	0	0	20	0	0	0	0	0	1	0	1	0	0	1
1	GG	G	G	1	0	GA	G	A	0	1	0	1	CT	C	T	0	1	0	1	27	0	11	0	0	0	2	0	0	0	0	1	0	1	1	0	0	0	5	0	0	0	0	0	0	0	0	0	1	0
1	GA	G	A	0	1	GG	G	G	1	0	0	0	CC	C	C	1	0	0	0	66	1	15	1	0	0	1	0	0	0	1	0	1	0	1	0	0	0	10	1	0	0	0	0	0	0	0	0	1	0
1	GG	G	G	1	0	GA	G	A	0	1	0	1	CT	C	T	0	1	0	1	41	0	13	0	1	1	2	0	0	0	0	1	0	0	0	0	0	1	45	0	0	0	0	0	0	0	0	0	1	0
1	GG	G	G	1	0	GG	G	G	1	0	0	0	CC	C	C	1	0	0	0	73	1	11	1	1	1	1	0	0	0	0	1	0	1	0	1	0	0	10	0	0	0	0	0	0	0	0	0	1	0
1	GA	G	A	0	1	GG	G	G	1	0	0	0	CT	C	T	0	1	0	1	53	1	12	1	0	1	3	1	0	0	1	1	0	0	0	0	1	0	40	1	0	0	0	0	0	0	1	0	0	0
1	GG	G	G	1	0	GG	G	G	1	0	0	0	CT	C	T	0	1	0	1	43	0	11	0	0	1	4	1	0	0	1	1	0	0	0	0	1	0	40	0	0	0	0	0	0	0	0	0	1	1
1	GG	G	G	1	0	GG	G	G	1	0	0	0	CT	C	T	0	1	0	1	50	1	13	1	0	1	3	1	0	0	1	1	0	1	1	0	0	0	20	0	0	1	0	1	1	0	0	0	1	0
1	GG	G	G	1	0	GG	G	G	1	0	0	0	CT	C	T	0	1	0	1	61	1	13	1	0	0	4	1	0	0	0	0	1	0	0	0	1	0	50	0	1	0	0	1	1	0	0	1	0	1
1	GG	G	G	1	0	GG	G	G	1	0	0	0	CC	C	C	1	0	0	0	63	1	12	1	0	0	4	1	0	0	0	1	0	1	0	1	0	0	95	0	0	1	0	1	0	0	0	1	0	1
1	GG	G	G	1	0	GG	G	G	1	0	0	0	TT	T	T	0	0	1	1	49	0	13	1	0	0	2	0	0	0	0	1	1	0	0	1	0	0	73.3	1	0	0	0	0	0	0	0	0	1	0
1	GG	G	G	1	0	GA	G	A	0	1	0	1	CT	C	T	0	1	0	1	54	1	12	1	1	0	3	1	0	0	0	1	0	0	0	0	1	0	50	1	0	0	0	0	0	0	0	0	1	0
1	GG	G	G	1	0	GA	G	A	0	1	0	1	CT	C	T	0	1	0	1	34	0	13	0	0	0	3	1	0	0	0	1	1	0	1	0	0	0	25	1	0	0	0	0	1	0	0	0	1	0
1	GG	G	G	1	0	GG	G	G	1	0	0	0	CC	C	C	1	0	0	0	27	0	14	0	0	0	1	0	0	0	1	1	1	0	1	0	0	0	10	0	1	0	0	1	0	0	0	0	1	0
1	GG	G	G	1	0	GA	G	A	0	1	0	1	CC	C	C	1	0	0	0	31	0	11	0	0	0	4	1	0	0	0	1	0	0	1	0	0	0	10	0	0	0	0	0	1	0	0	1	0	1
1	GG	G	G	1	0	GA	G	A	0	1	0	1	CT	C	T	0	0	0	1	44	0	15	0	0	0	1	0	0	0	0	1	1	0	1	0	0	0	10	0	1	0	0	1	0	0	0	0	1	0
1	GG	G	G	1	0	GG	G	G	1	0	0	0	CT	C	T	0	1	0	1	41	0	12	0	0	0	3	1	0	0	0	1	1	0	0	1	0	0	30	0	0	0	0	0	0	0	1	0	0	0
1	GG	G	G	1	0	GG	G	G	1	0	0	0	CT	C	T	0	1	0	1	30	0	12	0	0	0	4	1	0	0	0	1	1	0	0	1	0	0	10	0	0	0	0	0	1	0	0	1	0	1
1	GG	G	G	1	0	GG	G	G	1	0	0	0	CT	C	T	0	1	0	1	37	0	15	0	0	0	4	1	0	1	0	1	0	1	0	0	1	0	40	0	0	0	0	0	1	0	0	1	0	1
1	GG	G	G	1	0	GA	G	A	0	1	0	1	CC	C	C	1	0	0	0	49	0	12	1	0	0	1	0	0	0	0	1	1	0	0	1	0	0	60	0	0	0	0	0	1	0	1	0	0	0
1	GG	G	G	1	0	GG	G	G	1	0	0	0	CC	C	C	1	0	0	0	30	0	15	0	0	0	4	1	1	0	0	1	0	1	1	0	0	0	15	0	1	0	0	1	1	0	0	1	0	1
1	GG	G	G	1	0	GG	G	G	1	0	0	0	CC	C	C	1	0	0	0	52	1	11	1	0	0	3	1	0	1	0	1	0	1	0	1	0	0	10	1	0	0	0	0	1	0	1	0	0	0
1	GG	G	G	1	0	GA	G	A	0	1	0	1	CT	C	T	0	1	0	1	37	0	14	0	0	0	2	0	0	0	0	1	0	0	0	1	0	0	10	0	0	0	0	0	1	0	0	0	1	0
1	GG	G	G	1	0	GG	G	G	1	0	0	0	TT	T	T	0	0	1	1	43	0	12	0	0	0	2	0	0	0	0	1	0	0	0	0	1	0	50	0	1	0	0	1	0	0	0	0	1	0
1	GG	G	G	1	0	GG	G	G	1	0	0	0	CC	C	C	1	0	0	0	54	1	13	1	0	0	4	1	0	0	0	1	1	0	0	1	0	0	45	0	0	0	0	0	1	0	1	0	0	1
1	GG	G	G	1	0	GG	G	G	1	0	0	0	CC	C	C	1	0	0	0	34	0	12	1	1	1	2	0	0	0	1	1	1	0	0	0	1	0	50	0	1	0	0	1	1	0	0	0	1	0
1	GG	G	G	1	0	GA	G	A	0	1	0	1	CC	C	C	1	0	0	0	55	1	13	1	0	0	4	1	1	0	1	1	1	0	0	1	0	0	25	1	0	0	0	0	1	0	0	1	0	1
1	GG	G	G	1	0	GG	G	G	1	0	0	0	CC	C	C	1	0	0	0	35	0	15	0	1	0	2	0	0	0	0	1	0	1	1	0	0	0	20	0	0	0	0	0	0	0	0	0	1	0
1	GG	G	G	1	0	GA	G	A	0	1	0	1	CT	C	T	0	1	0	1	73	1	16	1	0	0	3	1	0	0	1	0	1	0	1	0	0	0	10	1	0	0	0	0	0	0	0	0	1	0
1	GG	G	G	1	0	GA	G	A	0	1	0	1	CC	C	C	1	0	0	0	29	0	16	0	0	0	2	0	0	0	0	1	1	0	0	1	0	0	20	1	0	0	0	0	1	0	0	1	0	1
1	GG	G	G	1	0	GG	G	G	1	0	0	0	TT	T	T	0	0	1	1	77	1	12	1	0	0	2	0	0	0	1	1	1	0	0	1	0	0	20	1	0	0	0	0	0	0	0	1	0	1
1	GG	G	G	1	0	AA	A	A	0	0	1	1	CC	C	C	1	0	0	0	68	1	11	1	0	0	3	1	0	0	0	1	1	0	0	1	0	0	20	0	0	0	0	0	0	0	1	0	0	0
1	GG	G	G	1	0	GG	G	G	1	0	0	0	CC	C	C	1	0	0	0	50	1	13	1	0	0	4	1	0	0	0	1	1	0	1	0	0	0	10	1	0	0	0	0	0	0	1	0	0	1
1	GG	G	G	1	0	GG	G	G	1	0	0	0	CC	C	C	1	0	0	0	61	1	12	1	0	1	3	1	0	0	0	1	0	0	0	1	0	0	30	0	1	0	0	1	0	0	0	0	1	0
1	GA	G	A	0	1	GG	G	G	1	0	0	0	TT	T	T	0	0	1	1	49	0	11	1	0	0	2	0	1	0	0	1	0	0	1	0	0	0	7	0	0	0	0	0	0	0	0	0	1	0
1	GG	G	G	1	0	GA	G	A	0	1	0	1	CT	C	T	0	1	0	1	40	0	12	0	1	1	2	0	0	1	0	1	0	1	1	0	0	0	10	0	0	1	0	1	0	1	0	0	0	0
1	GG	G	G	1	0	GG	G	G	1	0	0	0	CC	C	C	1	0	0	0	55	1	14	1	1	1	3	1	0	0	0	1	1	0	0	0	1	0	40	0	0	0	0	0	1	0	1	0	0	0
1	GG	G	G	1	0	GG	G	G	1	0	0	0	CT	C	T	0	1	0	1	68	1	14	1	0	0	2	0	0	0	0	1	1	0	0	1	0	0	5	1	0	0	0	0	0	0	0	0	1	0
1	GG	G	G	1	0	GG	G	G	1	0	0	0	TT	T	T	0	0	1	1	53	1	11	1	0	0	4	1	0	0	0	1	1	0	0	0	1	0	20	0	1	0	0	1	0	1	0	0	0	1
1	GG	G	G	1	0	GA	G	A	0	1	0	1	CT	C	T	0	1	0	1	60	1	13	1	1	0	4	1	0	0	0	1	0	1	0	0	0	1	50	0	0	1	0	1	1	0	1	0	0	1
1	GG	G	G	1	0	GG	G	G	1	0	0	0	TT	T	T	0	0	1	1	47	0	10	0	0	0	2	0	0	0	0	1	0	0	0	0	0	1	80	0	1	0	0	1	0	1	0	0	0	0
1	GG	G	G	1	0	GG	G	G	1	0	0	0	CC	C	C	1	0	0	0	75	1	13	1	0	1	3	1	0	0	0	1	0	0	0	1	0	0	30	0	0	0	0	0	1	0	1	0	0	0
1	GG	G	G	1	0	GG	G	G	1	0	0	0	CC	C	C	1	0	0	0	57	1	9	1	0	0	4	1	0	0	0	0	1	0	0	0	0	1	90	0	1	0	0	1	1	0	0	0	1	1
1	GG	G	G	1	0	GG	G	G	1	0	0	0	CT	C	T	0	1	0	1	45	0	12	0	0	0	2	0	0	0	1	1	0	1	1	0	0	0	20	0	1	0	0	1	0	0	0	0	1	0
1	GG	G	G	1	0	GA	G	A	0	1	0	1	CC	C	C	1	0	0	0	45	0	10	0	1	1	1	0	0	0	0	1	0	1	1	0	0	0	4	0	1	0	0	1	1	0	0	0	1	0
1	GG	G	G	1	0	GG	G	G	1	0	0	0	CT	C	T	0	1	0	1	46	0	13	0	0	0	3	1	0	1	0	1	0	0	1	0	0	0	5	0	0	0	1	1	1	0	0	0	1	0
1	GG	G	G	1	0	GG	G	G	1	0	0	0	CC	C	C	1	0	0	0	68	1	11	1	0	1	2	0	0	0	0	1	0	0	0	1	0	0	70	1	0	0	0	0	1	0	0	0	1	0
1	GG	G	G	1	0	GA	G	A	0	1	0	1	CT	C	T	0	1	0	1	61	1	11	1	0	0	4	1	1	0	0	1	0	0	0	1	0	0	30	0	1	0	0	1	1	0	0	0	1	1
1	GG	G	G	1	0	GG	G	G	1	0	0	0	CT	C	T	0	1	0	1	46	0	13	1	0	0	1	0	0	0	0	1	0	0	1	0	0	0	20	1	0	0	0	0	1	0	0	0	1	0
1	GG	G	G	1	0	GA	G	A	0	1	0	1	CC	C	C	1	0	0	0	55	1	12	1	0	1	3	1	0	0	1	0	1	0	0	1	0	0	50	0	1	0	0	1	1	0	0	0	1	0
1	GG	G	G	1	0	GG	G	G	1	0	0	0	CT	C	T	0	1	0	1	49	0	12	1	0	0	4	1	1	0	0	1	0	1	0	1	0	0	5	0	0	1	0	0	1	0	0	1	0	1
1	GG	G	G	1	0	GG	G	G	1	0	0	0	CC	C	C	1	0	0	0	45	0	12	0	0	0	3	1	0	0	1	0	0	1	1	0	0	0	25	0	1	0	0	1	1	0	0	0	1	0
1	GA	G	A	0	1	GA	G	A	0	1	0	1	CT	C	T	0	1	0	1	31	0	14	0	0	0	4	1	0	0	0	1	0	1	0	1	0	0	40	1	0	0	0	0	1	0	0	0	1	1
1	GG	G	G	1	0	GG	G	G	1	0	0	0	CT	C	T	0	1	0	1	65	1	14	1	0	1	4	1	0	0	0	1	0	0	0	0	1	0	70	1	0	0	0	0	1	0	0	1	0	1
1	GG	G	G	1	0	GG	G	G	1	0	0	0	CC	C	C	1	0	0	0	61	1	12	1	1	1	3	1	0	0	0	1	0	0	1	0	0	0	30	0	0	0	0	0	1	0	0	0	1	0
1	GG	G	G	1	0	GG	G	G	1	0	0	0	CC	C	C	1	0	0	0	44	0	12	0	0	1	2	0	0	0	0	1	0	0	1	0	0	0	15	0	0	0	0	0	0	0	0	0	1	0
1	GG	G	G	1	0	GA	G	A	0	1	0	1	CT	C	T	0	1	0	1	26	0	10	0	0	1	1	0	0	0	0	1	0	0	1	0	0	0	10	0	0	0	0	0	0	0	0	0	1	0
1	GG	G	G	1	0	GG	G	G	1	0	0	0	CC	C	C	1	0	0	0	38	0	12	0	0	0	3	1	0	0	0	1	0	1	0	1	0	0	25	0	0	1	0	1	1	0	0	0	1	0
1	GG	G	G	1	0	GG	G	G	1	0	0	0	CC	C	C	1	0	0	0	57	1	13	1	1	0	3	1	0	0	1	1	0	0	0	0	0	1	40	0	0	0	0	0	1	0	1	0	0	0
1	GG	G	G	1	0	GG	G	G	1	0	0	0	CC	C	C	1	0	0	0	43	0	12	0	1	1	4	1	1	0	1	1	0	0	0	0	0	1	25	0	1	0	0	1	1	0	0	0	1	1
1	GG	G	G	1	0	GG	G	G	1	0	0	0	CT	C	T	0	1	0	1	71	1	11	1	1	1	1	0	0	1	0	1	0	1	0	0	0	1	15	1	0	0	0	0	0	0	0	0	1	0
1	GG	G	G	1	0	GG	G	G	1	0	0	0	CC	C	C	1	0	0	0	52	1	15	1	1	1	3	1	1	0	0	1	0	0	0	1	0	0	20	0	0	0	0	0	0	0	1	0	0	1
1	GG	G	G	1	0	GA	G	A	0	1	0	1	CC	C	C	1	0	0	0	65	1	15	1	0	0	4	1	0	1	0	1	0	1	0	0	1	0	35	1	0	0	0	0	1	0	1	0	0	1
1	GG	G	G	1	0	GA	G	A	0	1	0	1	CT	C	T	0	1	0	1	54	1	11	1	0	0	2	0	0	0	0	0	0	0	0	0	1	0	40	1	0	0	0	0	1	0	0	0	1	0
1	GG	G	G	1	0	GG	G	G	1	0	0	0	CC	C	C	1	0	0	0	47	0	12	1	0	0	2	0	0	0	0	0	0	0	1	0	0	0	20	1	0	0	0	0	0	0	0	0	1	0
1	GG	G	G	1	0	GG	G	G	1	0	0	0	CT	C	T	0	1	0	1	46	0	12	1	1	1	2	0	0	0	0	1	0	0	0	0	0	1	45	0	0	0	0	0	1	0	0	0	1	0
1	GG	G	G	1	0	GG	G	G	1	0	0	0	CC	C	C	1	0	0	0	69	1	12	1	0	0	2	0	1	0	0	0	1	0	1	0	0	0	15	0	0	0	0	0	1	0	0	0	1	0
1	GG	G	G	1	0	GG	G	G	1	0	0	0	CC	C	C	1	0	0	0	23	0	11	0	0	0	2	0	0	0	0	1	0	1	0	0	1	0	40	0	0	0	0	0	0	0	0	0	1	0
1	GG	G	G	1	0	GG	G	G	1	0	0	0	CC	C	C	1	0	0	0	46	0	11	1	0	0	2	0	0	0	0	1	0	1	0	1	0	0	60	1	0	0	0	0	0	0	0	0	1	0
1	GG	G	G	1	0	GG	G	G	1	0	0	0	CC	C	C	1	0	0	0	33	0	12	0	1	0	3	1	0	0	1	0	0	0	0	1	0	0	30	0	0	0	0	0	1	0	0	0	1	0
1	GG	G	G	1	0	GA	G	A	0	1	0	1	CT	C	T	0	1	0	1	58	1	14	1	0	0	3	1	0	0	0	1	1	0	1	0	0	0	20	0	0	0	0	0	1	0	1	0	0	0
1	GG	G	G	1	0	AA	A	A	0	0	1	1	CC	C	C	1	0	0	0	36	0	13	0	1	1	2	0	0	0	0	1	0	1	0	1	0	0	40	1	0	0	0	0	0	0	1	0	0	0
1	GA	G	A	0	1	GA	G	A	0	1	0	1	CT	C	T	0	1	0	1	39	0	13	0	0	1	4	1	0	0	0	1	0	0	0	0	1	0	60	0	0	0	0	0	1	1	0	0	0	1
1	GG	G	G	1	0	GA	G	A	0	1	0	1	CC	C	C	1	0	0	0	40	0	13	0	1	1	3	1	0	0	0	1	0	0	0	0	1	0	30	0	0	0	0	0	1	0	1	0	0	0
1	GG	G	G	1	0	GG	G	G	1	0	0	0	CT	C	T	0	1	0	1	68	1	14	1	0	0	2	0	0	0	0	0	1	0	0	1	0	0	40	1	0	0	0	0	1	0	0	0	1	0
1	GG	G	G	1	0	GG	G	G	1	0	0	0	CC	C	C	1	0	0	0	56	1	11	1	0	1	1	0	0	0	1	0	0	0	0	1	0	0	20	0	0	0	0	0	0	0	0	0	1	0
1	GG	G	G	1	0	GG	G	G	1	0	0	0	CT	C	T	0	1	0	1	44	0	10	0	0	0	3	1	0	0	0	0	0	1	0	0	1	0	40	1	0	0	0	0	1	0	0	0	1	0
1	GG	G	G	1	0	GA	G	A	0	1	0	1	CC	C	C	1	0	0	0	43	0	11	0	0	0	2	0	0	1	0	0	0	1	0	0	0	1	50	1	0	0	0	0	1	0	0	0	1	0
1	GG	G	G	1	0	GG	G	G	1	0	0	0	CC	C	C	1	0	0	0	62	1	10	1	0	0	1	0	0	0	1	0	0	0	0	0	1	0	40	0	1	0	0	1	0	0	0	0	1	0
1	GG	G	G	1	0	GG	G	G	1	0	0	0	CC	C	T	0	1	0	1	55	1	9	1	0	0	2	0	1	0	0	0	1	0	1	0	0	0	20	1	0	0	0	0	1	0	1	0	0	0
1	GG	G	G	1	0	GG	G	G	1	0	0	0	CC	C	C	1	0	0	0	60	1	13	1	0	1	2	0	0	0	1	1	0	0	0	0	1	0	30	1	0	0	0	0	1	0	0	0	1	0
1	GG	G	G	1	0	GA	G	A	0	1	0	1	CC	C	C	1	0	0	0	48	0	14	1	1	1	3	1	0	0	1	1	1	0	0	0	1	0	25	0	0	0	0	0	1	0	1	0	0	0
1	GG	G	G	1	0	GG	G	G	1	0	0	0	CT	C	T	0	1	0	1	34	0	13	0	1	1	3	1	0	0	0	1	1	0	1	0	0	0	20	0	1	0	0	1	0	0	1	0	0	0
1	GG	G	G	1	0	GG	G	G	1	0	0	0	CC	C	C	1	0	0	0	69	1	8	1	0	0	4	1	0	0	0	1	1	0	0	1	0	0	50	0	1	0	0	1	0	0	0	0	1	1
1	GG	G	G	1	0	GG	G	G	1	0	0	0	CC	C	C	1	0	0	0	49	0	10	1	0	0	2	0	0	0	0	1	0	0	1	0	0	0	25	0	0	0	0	0	0	0	0	0	1	0
1	GG	G	G	1	0	GG	G	G	1	0	0	0	CC	C	C	1	0	0	0	41	0	12	0	0	0	3	1	1	0	0	1	0	0	0	1	0	0	70	0	0	0	0	0	1	0	1	0	0	0
1	GG	G	G	1	0	GG	G	G	1	0	0	0	CT	C	T	0	1	0	0	53	1	12	1	1	1	4	1	0	1	0	1	0	1	0	1	0	0	50	0	0	0	0	0	0	0	0	1	0	1
1	GG	G	G	1	0	GG	G	G	1	0	0	0	CT	C	T	0	1	0	1	33	0	12	0	0	0	2	0	0	0	0	1	1	0	0	0	0	1	80	0	0	0	0	0	1	0	0	0	1	0
1	GG	G	G	1	0	GG	G	G	1	0	0	0	CC	C	C	1	0	0	0	65	1	11	1	0	0	2	0	0	0	0	1	1	0	0	0	1	0	20	1	0	0	0	0	1	0	0	0	1	0
1	GG	G	G	1	0	GG	G	G	1	0	0	0	CC	C	C	1	0	0	0	49	0	11	1	0	0	2	0	0	0	0	1	1	0	0	0	1	0	15	0	0	0	0	0	1	0	1	0	0	0
1	GG	G	G	1	0	GA	G	A	0	1	0	1	TT	T	T	0	0	1	1	37	0	13	0	1	0	2	0	1	0	0	1	0	1	0	1	0	0	10	0	0	0	0	0	0	0	0	0	1	0
1	GG	G	G	1	0	GA	G	A	0	1	0	1	CC	C	C	1	0	0	0	34	0	12	0	0	0	2	0	0	0	0	1	0	0	1	0	0	0	25	1	0	0	0	0	0	0	0	0	1	0
1	GG	G	G	1	0	GG	G	G	1	0	0	0	CT	C	T	0	1	0	1	76	1	14	1	1	1	2	0	0	0	0	1	0	0	0	1	0	0	50	0	0	0	0	0	1	0	0	0	1	0
1	GG	G	G	1	0	GG	G	G	1	0	0	0	CC	C	C	1	0	0	0	37	0	12	0	0	1	3	1	0	0	0	0	1	0	0	0	1	0	20	0	0	1	0	1	0	0	1	0	0	0
1	GG	G	G	1	0	GG	G	G	1	0	0	0	CC	C	C	1	0	0	0	35	0	13	0	1	1	3	1	0	0	1	1	0	1	0	0	1	0	40	0	1	0	0	1	0	0	1	0	0	0
1	GG	G	G	1	0	GA	G	A	0	1	0	1	CT	C	T	0	1	0	1	46	0	13	0	0	0	2	0	0	0	0	1	0	1	1	0	0	0	20	0	0	1	0	1	0	0	1	0	0	0
1	GG	G	G	1	0	GG	G	G	1	0	0	0	CC	C	C	1	0	0	0	22	0	11	0	0	1	4	1	0	1	0	1	0	0	0	1	0	0	80	1	0	0	0	0	1	0	0	1	0	1
1	GA	G	A	0	1	GG	G	G	1	0	0	0	CC	C	C	1	0	0	0	38	0	12	0	0	0	3	1	0	0	0	1	0	0	0	1	0	0	50	1	0	0	0	0	1	0	1	0	0	0
1	GG	G	G	1	0	GG	G	G	1	0	0	0	CT	C	T	0	1	0	1	32	0	14	0	0	0	2	0	0	0	0	1	0	0	0	0	1	0	40	1	0	0	0	0	1	0	0	0	1	0
1	GG	G	G	1	0	GA	G	A	0	1	0	1	CC	C	C	1	0	0	0	40	0	9	0	0	0	1	0	0	0	0	1	0	0	0	1	0	0	20	0	1	0	0	1	0	0	0	0	1	0
1	GG	G	G	1	0	GG	G	G	1	0	0	0	CT	C	T	0	1	0	1	37	0	15	0	0	0	3	1	0	0	1	0	1	0	0	0	1	0	60	0	0	0	0	0	0	0	0	0	1	0
1	GG	G	G	1	0	GG	G	G	1	0	0	0	CT	C	T	0	1	0	1	42	0	10	0	0	1	2	0	0	0	0	1	0	1	0	1	0	0	40	0	1	0	0	1	0	0	0	0	1	0
1	GG	G	G	1	0	GG	G	G	1	0	0	0	CT	C	T	0	1	0	1	51	1	12	1	0	0	1	0	0	0	1	0	0	1	0	0	1	0	60	0	0	0	0	0	1	0	0	0	1	0
1	GG	G	G	1	0	GG	G	G	1	0	0	0	CC	C	C	1	0	0	0	59	1	14	1	0	0	2	0	1	0	0	1	0	1	0	1	0	0	5	0	0	0	0	0	0	0	0	0	1	0
1	GG	G	G	1	0	GG	G	G	1	0	0	0	CC	C	C	1	0	0	0	51	1	10	1	0	0	2	0	0	0	0	1	0	0	0	0	0	1	30	0	0	0	0	0	0	0	0	0	1	0
0	GG	G	G	1	0	GG	G	G	1	0	0	0	CT	C	T	0	1	0	1	26	0			0	0
0	GG	G	G	1	0	GA	G	A	0	1	0	1	CC	C	C	1	0	0	0	25	0			0	0
0	GG	G	G	1	0	GG	G	G	1	0	0	0								49	0			0	0
0	GG	G	G	1	0	GA	G	A	0	1	0	1	CC	C	C	1	0	0	0	57	1			0	0
0	GG	G	G	1	0	GG	G	G	1	0	0	0	CT	C	T	0	1	0	1	31	0			0	0
0	GG	G	G	1	0	GG	G	G	1	0	0	0	CC	C	C	1	0	0	0	32	0			0	0
0	GG	G	G	1	0	GG	G	G	1	0	0	0	CC	C	C	1	0	0	0	31	0			0	0
0	GG	G	G	1	0	GG	G	G	1	0	0	0	CC	C	C	1	0	0	0	39	0			0	0
0	GG	G	G	1	0															38	0			0	0
0	GG	G	G	1	0															47	0			0	0
0	GG	G	G	1	0	GG	G	G	1	0	0	0	CT	C	T	0	1	0	1	34	0			1	1
0	GG	G	G	1	0	GA	G	A	0	1	0	1	CC	C	C	1	0	0	0	54	1			0	0
0	GG	G	G	1	0	GG	G	G	1	0	0	0	CC	C	C	1	0	0	0	52	1			0	0
0	GG	G	G	1	0	GG	G	G	1	0	0	0	CC	C	C	1	0	0	0	28	0			1	0
0	GG	G	G	1	0	GA	G	A	0	1	0	1	CT	C	T	0	1	0	1	28	0			0	1
0	GG	G	G	1	0	GG	G	G	1	0	0	0	CC	C	C	1	0	0	0	32	0			0	0
0	GG	G	G	1	0	GG	G	G	1	0	0	0	CC	C	C	1	0	0	0	49	0			0	0
0	GG	G	G	1	0	GG	G	G	1	0	0	0	CT	C	T	0	1	0	1	22	0			1	1
0	GG	G	G	1	0	GA	G	A	0	1	0	1	CC	C	C	1	0	0	0	44	0			0	0
0	GG	G	G	1	0	GA	G	A	0	1	0	1	CT	C	T	0	1	0	1	52	1			0	0
0	GG	G	G	1	0	GG	G	G	1	0	0	0	TT	T	T	0	0	1	1	65	1			0	0
0	GG	G	G	1	0	GG	G	G	1	0	0	0	CT	C	T	0	1	0	1	54	1			0	0
0	GG	G	G	1	0	GG	G	G	1	0	0	0	CC	C	C	1	0	0	0	47	0			0	0
0	GG	G	G	1	0	GA	G	A	0	1	0	1	CC	C	C	1	0	0	0	46	0			1	1
0	GG	G	G	1	0	GG	G	G	1	0	0	0	CT	C	T	0	1	0	1	69	1			0	0
0	GG	G	G	1	0	GG	G	G	1	0	0	0	CT	C	T	0	1	0	1	23	0			0	0
0	GG	G	G	1	0	GA	G	A	0	1	0	1	CT	C	T	0	1	0	1	46	0			0	0
0	GG	G	G	1	0	GA	G	A	0	1	0	1								33	0			0	0
0	GG	G	G	1	0	GG	G	G	1	0	0	0	CT	C	T	0	1	0	1	58	1			1	1
0	GG	G	G	1	0	GA	G	A	0	1	0	1	CT	C	T	0	1	0	1	36	0			0	0
0	GG	G	G	1	0	GA	G	A	0	1	0	1	TT	T	T	0	0	1	1	39	0			0	0
0	GG	G	G	1	0	GG	G	G	1	0	0	0	CC	C	C	1	0	0	0	40	0			1	0
0	GG	G	G	1	0	GG	G	G	1	0	0	0	CC	C	C	1	0	0	0	68	1			0	0
0	GG	G	G	1	0	GG	G	G	1	0	0	0	CT	C	T	0	1	0	1	56	1			0	0
0	GG	G	G	1	0	GA	G	A	0	1	0	1	CC	C	C	1	0	0	0	44	0			0	0
0	GG	G	G	1	0	GG	G	G	1	0	0	0	CT	C	T	0	1	0	1	43	0			1	0
0	GG	G	G	1	0	GG	G	G	1	0	0	0	CC	C	C	1	0	0	0	62	1			0	0
0	GG	G	G	1	0	GG	G	G	1	0	0	0	CC	C	C	1	0	0	0	55	1			0	0
0	GG	G	G	1	0	GG	G	G	1	0	0	0	CT	C	T	0	1	0	1	60	1			0	0
0	GG	G	G	1	0	GA	G	A	0	1	0	1	CC	C	C	1	0	0	0	33	0			0	0
0	GG	G	G	1	0	GG	G	G	1	0	0	0								39	0			0	0
0	GG	G	G	1	0	GA	G	A	0	1	0	1								34	0			0	0
0	GG	G	G	1	0	GG	G	G	1	0	0	0	CT	C	T	0	1	0	1	26	0			0	0
0	GG	G	G	1	0	GA	G	A	0	1	0	1	CC	C	C	1	0	0	0	54	1			0	0
0	GG	G	G	1	0	GG	G	G	1	0	0	0	CT	C	T	0	1	0	1	21	0			0	0
0	GG	G	G	1	0	GA	G	A	0	1	0	1	CC	C	C	1	0	0	0	22	0			0	0
0	GG	G	G	1	0	GA	G	A	0	1	0	1	CC	C	C	1	0	0	0	54	1			0	0
0	GG	G	G	1	0	GG	G	G	1	0	0	0								68	1			0	0
0	GG	G	G	1	0	GG	G	G	1	0	0	0	CT	C	T	0	1	0	1	84	1			0	0
0	GG	G	G	1	0	GG	G	G	1	0	0	0	CC	C	C	1	0	0	0	79	1			0	0
0	GG	G	G	1	0	GG	G	G	1	0	0	0								29	0			0	1
0	GG	G	G	1	0	GG	G	G	1	0	0	0	CC	C	C	1	0	0	0	52	1			0	0
0	GG	G	G	1	0	GA	G	A	0	1	0	1	CC	C	C	1	0	0	0	57	1			0	0
0	GG	G	G	1	0	GG	G	G	1	0	0	0	CC	C	C	1	0	0	0	76	1			0	0
0	GG	G	G	1	0	GG	G	G	1	0	0	0								48	0			1	1
0	GG	G	G	1	0	GG	G	G	1	0	0	0	CC	C	C	1	0	0	0	65	1			0	0
0	GG	G	G	1	0	GA	G	A	0	1	0	1	CC	C	C	1	0	0	0	53	1			0	0
0	GG	G	G	1	0	GG	G	G	1	0	0	0	CC	C	C	1	0	0	0	33	0			0	0
0	GG	G	G	1	0	GG	G	G	1	0	0	0	CT	C	T	0	1	0	1	60	1			0	0
0	GG	G	G	1	0	GG	G	G	1	0	0	0	CC	C	C	1	0	0	0	56	1			0	0
0	GG	G	G	1	0	GG	G	G	1	0	0	0	CC	C	C	1	0	0	0	31	0			0	0
0	GG	G	G	1	0	GG	G	G	1	0	0	0	CT	C	T	0	1	0	1	51	1			0	0
0	GG	G	G	1	0	GG	G	G	1	0	0	0	CC	C	C	1	0	0	0	49	0			0	0
0	GG	G	G	1	0	GG	G	G	1	0	0	0	CC	C	C	1	0	0	0	52	1			0	0
0	GG	G	G	1	0	GG	G	G	1	0	0	0								57	1			1	1
0	GG	G	G	1	0	GG	G	G	1	0	0	0	TT	T	T	0	0	1	1	58	1			0	0
0	GG	G	G	1	0	AA	A	A	0	0	1	1	CC	C	C	1	0	0	0	60	1			0	0
0	GG	G	G	1	0	GG	G	G	1	0	0	0	CT	C	T	0	1	0	1	52	1			0	0
0	GG	G	G	1	0	GG	G	G	1	0	0	0	CT	C	T	0	1	0	1	52	1			0	0
0	GG	G	G	1	0	GG	G	G	1	0	0	0	CC	C	C	1	0	0	0	52	1			0	0
0	GG	G	G	1	0	GG	G	G	1	0	0	0								47	0			0	0
0	GG	G	G	1	0	GG	G	G	1	0	0	0	CC	C	C	1	0	0	0	50	1			0	0
0	GG	G	G	1	0	GG	G	G	1	0	0	0	CT	C	T	0	1	0	1	67	1			0	0
0	GG	G	G	1	0	GA	G	A	0	1	0	1	TT	T	T	0	0	1	1	47	0			0	0
0	GG	G	G	1	0	GA	G	A	0	1	0	1	CC	C	C	1	0	0	0	45	0			1	0
0	GG	G	G	1	0	GG	G	G	1	0	0	0								55	1			0	0
0	GG	G	G	1	0	GG	G	G	1	0	0	0								69	1			0	0
0	GG	G	G	1	0	GA	G	A	0	1	0	1								54	1			1	0
0	GG	G	G	1	0	GG	G	G	1	0	0	0								49	0			0	0
0	GG	G	G	1	0	GG	G	G	1	0	0	0								52	1			0	0
0	GG	G	G	1	0	GG	G	G	1	0	0	0	CC	C	C	1	0	0	0	57	1			0	0
0	GG	G	G	1	0	GA	G	A	0	1	0	1	CT	C	T	0	1	0	1	66	1			0	0
0	GG	G	G	1	0	GG	G	G	1	0	0	0	CC	C	C	1	0	0	0	50	1			0	1
0	GG	G	G	1	0	GG	G	G	1	0	0	0	CC	C	C	1	0	0	0	41	0			0	0
0	GG	G	G	1	0	GA	G	A	0	1	0	1								44	0			0	0
0	GG	G	G	1	0	GA	G	G	0	1	0	1								61	1			0	0
0	GG	G	G	1	0	GG	G	G	1	0	0	0								59	1			1	0
0	GG	G	G	1	0	GG	G	G	1	0	0	0	CT	C	T	0	1	0	1	68	1			0	1
0	GG	G	G	1	0	GA	G	A	0	1	0	1								58	1			0	0
0	GG	G	G	1	0	GG	G	G	1	0	0	0								54	1			0	0
0	GG	G	G	1	0	GG	G	G	1	0	0	0	CT	C	T	0	1	0	1	55	1			0	0
0	GG	G	G	1	0	GA	G	A	0	1	0	1								58	1			0	0
0	GG	G	G	1	0	GG	G	G	1	0	0	0	CC	C	C	1	0	0	0	53	1			0	0
0	GG	G	G	1	0	GG	G	G	1	0	0	0	CC	C	C	1	0	0	0	43	0			0	0
0	GG	G	G	1	0	GG	G	G	1	0	0	0								50	1			0	0
0	GG	G	G	1	0	GG	G	G	1	0	0	0	CC	C	C	1	0	0	0	47	0			0	0
0	GG	G	G	1	0	GG	G	G	1	0	0	0	CT	C	T	0	1	0	1	59	1			1	1
0	GG	G	G	1	0	GG	G	G	1	0	0	0	CC	C	C	1	0	0	0	46	0			0	0
0	GG	G	G	1	0	GA	G	A	0	1	0	1	CC	C	C	0	0	0	0	38	0			0	0
0	GG	G	G	1	0	GG	G	G	1	0	0	0	CC	C	C	1	0	0	0	51	1			0	0
0	GG	G	G	1	0	GG	G	G	1	0	0	0	CT	C	T	0	1	0	1	36	0			0	0
0	GG	G	G	1	0	GA	G	A	0	1	0	1	TT	T	T	0	0	1	1	48	0			0	0
0	GG	G	G	1	0	GG	G	G	1	0	0	0	CT	C	T	0	1	0	1	30	0			1	0
0	GG	G	G	1	0	GG	G	G	1	0	0	0	CC	C	C	1	0	0	0	59	1			0	0
0	GG	G	G	1	0	GA	G	A	0	1	0	1								35	0			0	0
0	GG	G	G	1	0	GG	G	G	1	0	0	0								69	1			0	0
0	GG	G	G	1	0	GG	G	G	1	0	0	0								46	0			0	0
0	GG	G	G	1	0	GG	G	G	1	0	0	0	CC	C	C	1	0	0	0	62	1			0	0
0	GG	G	G	1	0	GA	G	A	0	1	0	1								38	0			0	0
0	GG	G	G	1	0	GG	G	G	1	0	0	0								63	1			0	0
0	GG	G	G	1	0	GA	G	A	0	1	0	1	CC	C	C	1	0	0	0	39	0			0	0
0	GG	G	G	1	0															52	1			0	0
0	GG	G	G	1	0	GA	G	A	0	1	0	1								49	0			0	0
0	GG	G	G	1	0	GG	G	G	1	0	0	0	CC	C	C	1	0	0	0	65	1			0	0
0	GG	G	G	1	0	GG	G	G	1	0	0	0	CC	C	C	1	0	0	0	73	1			0	0
0	GG	G	G	1	0	GG	G	G	1	0	0	0								64	1			0	0
0	GG	G	G	1	0	GG	G	G	1	0	0	0	TT	T	T	0	0	1	1	66	1			1	0
0	GG	G	G	1	0	GA	G	A	0	1	0	1								50	1			0	0
0	GG	G	G	1	0	GG	G	G	1	0	0	0	CT	C	T	0	1	0	1	36	0			0	0
0	GG	G	G	1	0	GA	G	A	0	1	0	1								62	1			0	1
0	GG	G	G	1	0	GG	G	G	1	0	0	0	CC	C	C	1	0	0	0	48	0			0	0
0	GG	G	G	1	0	GG	G	G	1	0	0	0								41	0			0	0
0						GG	G	G	1	0	0	0	CC	C	C	1	0	0	0	52	1			0	0
0	GG	G	G	1	0	GG	G	G	1	0	0	0								34	0			0	0
0	GG	G	G	1	0	GG	G	G	1	0	0	0	CT	C	T	0	1	0	1	54	1			0	0
0	GG	G	G	1	0	AA	A	A	0	0	1	1	CC	C	C	1	0	0	0	39	0			0	0
0	GG	G	G	1	0	GG	G	G	1	0	0	0								46	0			0	0
0	GG	G	G	1	0	GA	G	A	0	1	0	1	CC	C	C	1	0	0	0	62	1			0	0
0	GG	G	G	1	0	GA	G	A	0	1	0	1	CC	C	C	1	0	0	0	54	1			0	0
0	GG	G	G	1	0	GG	G	G	1	0	0	0								43	0			1	0
0	GG	G	G	1	0	GG	G	G	1	0	0	0	CC	C	C	1	0	0	0	46	0			0	0
0	GG	G	G	1	0	GG	G	G	1	0	0	0								73	1			0	0
0	GG	G	G	1	0	GG	G	G	1	0	0	0	CC	C	C	1	0	0	0	52	1			0	0
0	GG	G	G	1	0	GG	G	G	1	0	0	0	CC	C	C	1	0	0	0	33	0			0	1
0	GG	G	G	1	0	GG	G	G	1	0	0	0								40	0			0	0
0	GG	G	G	1	0	GG	G	G	1	0	0	0	CC	C	C	1	0	0	0	37	0			0	0
0	GG	G	G	1	0	GG	G	G	1	0	0	0								55	1			0	0
0	GG	G	G	1	0	GG	G	G	1	0	0	0	CC	C	C	1	0	0	0	60	1			0	0
0	GG	G	G	1	0	GG	G	G	1	0	0	0								42	0			0	0
0	GG	G	G	1	0	GA	G	A	0	1	0	1	CC	C	C	1	0	0	0	58	1			1	0
0	GG	G	G	1	0	GG	G	G	1	0	0	0	CC	C	C	1	0	0	0	46	0			0	0
0	GG	G	G	1	0	GG	G	G	1	0	0	0	CT	C	T	0	1	0	1	62	1			0	0
0						GG	G	G	1	0	0	0	CC	C	C	1	0	0	0	55	1			0	0
0	GG	G	G	1	0	GG	G	G	1	0	0	0	CC	C	C	1	0	0	0	52	1			0	0
0						GA	G	A	0	1	0	1	CT	C	T	0	1	0	1	61	1			0	1
0	GG	G	G	1	0	GG	G	G	1	0	0	0	TT	T	T	0	0	1	1	38	0			0	0
0	GG	G	G	1	0	GG	G	G	1	0	0	0	CT	C	T	0	1	0	1	47	0			0	0
0	GG	G	G	1	0	GG	G	G	1	0	0	0	CC	C	C	1	0	0	0	31	0			0	0
0	GG	G	G	1	0	GA	G	A	1	1	0	1	CC	C	C	1	0	0	0	55	1			1	1
0						GG	G	G	1	0	0	0	CC	C	C	1	0	0	0	39	0			0	0
0	GG	G	G	1	0	GA	G	A	0	1	0	1	CC	C	C	1	0	0	0	59	1			1	0
0	GG	G	G	1	0	GA	G	A	0	1	0	1								40	0			0	0
0	GG	G	G	1	0	GA	G	A	0	1	0	1	CT	C	T	0	1	0	1	72	1			0	0
0	GG	G	G	1	0	GG	G	G	1	0	0	0	TT	T	T	0	0	1	1	66	1			0	0
0	GG	G	G	1	0	GA	G	A	0	1	0	1	CC	C	C	1	0	0	0	61	1			0	0
0	GG	G	G	1	0	GA	G	A	0	1	0	1	CT	C	T	0	1	0	1	48	0			0	0
0	GG	G	G	1	0	GG	G	G	1	0	0	0								42	0			0	0
0	GG	G	G	1	0	GG	G	G	1	0	0	0	CC	C	C	1	0	0	0	51	1			0	0
0	GG	G	G	1	0	GG	G	G	1	0	0	0	CC	C	C	1	0	0	0	42	0			0	1
0	GG	G	G	1	0	GA	G	A	0	1	0	1	CT	C	T	0	1	0	1	47	0			0	0
0	GG	G	G	1	0	GG	G	G	1	0	0	0	CC	C	C	1	0	0	0	42	0			0	0
0	GG	G	G	1	0	GG	G	G	1	0	0	0	CT	C	T	0	1	0	1	52	1			0	0
0	GG	G	G	1	0	GG	G	G	1	0	0	0	CC	C	C	1	0	0	0	68	1			0	0
0	GG	G	G	1	0	GG	G	G	1	0	0	0	CT	C	T	0	1	0	1	40	0			0	0
0	GG	G	G	1	0	GA	G	A	0	1	0	1	CC	C	C	1	0	0	0	45	0			1	0
0	GG	G	G	1	0	GA	G	A	0	1	0	1	CT	C	T	0	1	0	1	69	1			1	0
0	GG	G	G	1	0	GG	G	G	1	0	0	0	CC	C	C	1	0	0	0	63	1			0	0
0	GG	G	G	1	0								CT	C	T	0	1	0	1	46	0			1	0
0	GG	G	G	1	0	GA	G	A	0	1	0	1	CC	C	C	1	0	0	0	44	0			0	0
0	GG	G	G	1	0	AA	A	A	0	0	1	1	CC	C	C	1	0	0	0	56	1			1	0
0	GG	G	G	1	0	GG	G	G	1	0	0	0	CT	C	T	0	1	0	1	48	0			0	0
0						GG	G	G	1	0	0	0	CT	C	T	0	1	0	1	48	0			0	0
0	GG	G	G	1	0	GA	G	A	0	1	0	1	CC	C	C	1	0	0	0	62	1			0	0
0	GG	G	G	1	0	GG	G	G	1	0	0	0	CC	C	C	1	0	0	0	56	1			1	0
0		G	G			GG	G	G	1	0	0	0	CT	C	T	0	1	0	1	45	0			1	1
0						GA	G	A	0	1	0	1	CC	C	C	1	0	0	0	48	0			0	0
0	GG	G	G	1	0	GG	G	G	1	0	0	0	CC	C	C	1	0	0	0	54	1			1	0
0	GG	G	G	1	0	GG	G	G	1	0	0	0	TT	T	T	0	0	1	1	51	1			0	1
0	GG	G	G	1	0	GA	G	A	0	1	0	1	CC	C	C	1	0	0	0	46	0			1	0
0	GG	G	G	1	0	GG	G	G	1	0	0	0	CC	C	C	1	0	0	0	46	0			0	0
0						GG	G	G	1	0	0	0	CT	C	T	0	1	0	1	51	1			1	0
0	GG	G	G	1	0	GG	G	G	1	0	0	0	CC	C	C	1	0	0	0	50	1			0	0
0	GG	G	G	1	0	GG	G	G	1	0	0	0	CC	C	C	1	0	0	0	54	1			0	0
0						GG	G	G	1	0	0	0	CT	C	T	0	1	0	1	26	0			0	0
0	GG	G	G	1	0	GA	G	A	0	1	0	1	CC	C	C	1	0	0	0	45	0			1	0
0	GG	G	G	1	0	GG	G	G	1	0	0	0	CC	C	C	1	0	0	0	40	0			0	0
0	GG	G	G	1	0	GG	G	G	1	0	0	0	CC	C	C	1	0	0	0	58	1			0	0
0	GG	G	G	1	0	GG	G	G	1	0	0	0	CT	C	T	0	1	0	1	42	0			0	0
0	GG	G	G	1	0	GG	G	G	1	0	0	0	TT	T	T	0	0	1	1	39	0			0	0
0	GG	G	G	1	0	GG	G	G	1	0	0	0	CT	C	T	0	1	0	1	29	0			0	0
0						GA	G	A	0	1	0	1	CC	C	C	1	0	0	0	42	0			0	0
0	GG	G	G	1	0	GG	G	G	1	0	0	0	CT	C	T	0	1	0	1	60	1			0	0
0						GA	G	A	0	1	0	1	CC	C	C	1	0	0	0	43	0			0	0
0						GG	G	G	1	0	0	0	CC	C	C	1	0	0	0	51	1			0	0
0	GG	G	G	1	0	GG	G	G	1	0	0	0	CC	C	C	1	0	0	0	23	0			0	0
0						GA	G	A	0	1	0	1	CC	C	C	1	0	0	0	45	0			0	0
0	GG	G	G	1	0															48	0			0	1
0	GG	G	G	1	0	GG	G	G	1	0	0	0	CT	C	T	0	1	0	1	42	0			0	0
0	GG	G	G	1	0	GG	G	G	1	0	0	0	CC	C	C	1	0	0	0	40	0			0	0
0	GG	G	G	1	0	GG	G	G	1	0	0	0	CC	C	C	1	0	0	0	48	0			0	0
0	GG	G	G	1	0	GG	G	G	1	0	0	0	CT	C	T	0	1	0	1	36	0			0	0
0												0	CC	C	C	1	0	0	0	40	0			0	1
0	GG	G	G	1	0	GG	G	G	1	0	0	0	CC	C	C	1	0	0	0	38	0			0	0
0	GG	G	G	1	0	GG	G	G	1	0	0	0								55	1			0	0
0	GG	G	G	1	0	GG	G	G	1	0	0	0	CC	C	C	1	0	0	0	39	0			0	0
0	GG	G	G	1	0	GG	G	G	1	0	0	0	CC	C	C	1	0	0	0	55	1			0	0
0	GG	G	G	1	0	GA	G	A	0	1	0	1	CC	C	C	1	0	0	0	59	1			0	0
0	GG	G	G	1	0	GG	G	G	1	0	0	0	CT	C	T	0	1	0	1	34	0			0	0
0	GG	G	G	1	0	GG	G	G	1	0	0	0	CT	C	T	0	1	0	1	46	0			0	0
0	GG	G	G	1	0	GG	G	G	1	0	0	0	CC	C	C	1	0	0		33	0			0	0
0	GG	G	G	1	0	GG	G	G	1	0	0	0	TT	T	T	0	0	1	1	51	1			0	0
0	GG	G	G	1	0	GG	G	G	1	0	0	0	CC	C	C	1	0	0	0	45	0			0	0
0	GG	G	G	1	0	GG	G	G	1	0	0	0	CC	C	C	1	0	0	0	47	0			0	0
0	GG	G	G	1	0	GG	G	G	1	0	0	0	CC	C	C	1	0	0	0	47	0			0	0
0						GG	G	G	1	0	0	0	CT	C	T	0	1	0	1	29	0			0	0
0	GG	G	G	1	0	GA	G	A	0	1	0	1	CC	C	C	1	0	0	0	50	1			0	0
0	GG	G	G	1	0								CC	C	C	1	0	0	0	45	0			0	0
0	GG	G	G	1	0	GG	G	G	1	0	0	0	CC	C	C	1	0	0	0	30	0			0	0
0						GG	G	G	1	0	0	0	CT	C	T	0	1	0	1	35	0			0	0
0	GG	G	G	1	0	GG	G	G	1	0	0	0	CT	C	T	0	1	0	1	38	0			0	0
0	GG	G	G	1	0	GG	G	G	1	0	0	0	CT	C	T	0	1	0	1	54	1			0	0
0	GG	G	G	1	0	GG	G	G	1	0	0	0	CT	C	T	0	1	0	1	54	1			0	0
0	GG	G	G	1	0	GG	G	G	1	0	0	0	CC	C	C	1	0	0	0	58	1			0	1
0	GG	G	G	1	0	GG	G	G	1	0	0	0	CT	C	T	0	1	0	1	30	0			0	0
0	GG	G	G	1	0	GG	G	G	1	0	0	0	CT	C	T	0	1	0	1	21	0			0	0
0	GG	G	G	1	0	GG	G	G	1	0	0	0	TT	T	T	0	0	1	1	24	0			0	0
0	GG	G	G	1	0	GG	G	G	1	0	0	0	CC	C	C	1	0	0	0	29	0			0	0
0	GG	G	G	1	0								CT	C	T	0	1	0	1	22	0			0	0
0	GG	G	G	1	0	GG	G	G	1	0	0	0	TT	T	T	0	0	1	1	53	1			0	0
0	GG	G	G	1	0	GG	G	G	1	0	0	0	CC	C	C	1	0	0	0	53	1			0	0
0						GG	G	G	1	0	0	0	CC	C	C	1	0	0	0	43	0			0	0
0	GG	G	G	1	0	GG	G	G	1	0	0	0	CC	C	C	1	0	0	0	48	0			0	0
0						GG	G	G	1	0	0	0	CT	C	T	0	1	0	1	67	1			0	0
0						GA	G	A	0	1	0	1	CC	C	C	1	0	0	0	49	0			0	0
0						GA	G	A	0	1	0	1	CC	C	C	1	0	0	0	55	1			0	0
0						GG	G	G	1	0	0	0	TT	T	T	0	0	1	1	68	1			0	0
0	GG	G	G	1	0	GG	G	G	1	0	0	0	CT	C	C	0	1	0	1	67	1			0	0
0	GG	G	G	1	0	GA	G	A	0	1	0	1								72	1			0	0
0	GG	G	G	1	0	GG	G	G	1	0	0	0	CC	C	C	1	0	0	0	45	0			1	1
0	GG	G	G	1	0	GG	G	G	1	0	0	0	TT	T	T	0	0	1	1	55	1			0	0
0						GG	G	G	1	0	0	0	CC	C	C	1	0	0	0	44	0			0	0
0	GG	G	G	1	0	GG	G	G	1	0	0	0								38	0			1	1
0	GG	G	G	1	0	GG	G	G	1	0	0	0	CC	C	C	1	0	0	0	35	0			0	0
0						GG	G	G	1	0	0	0	CC	C	C	1	0	0	0	46	0			0	0
0	GG	G	G	1	0	GA	G	A	0	1	0	1	CC	C	C	1	0	0	0	69	1			1	0
0	GG	G	G	1	0	GG	G	G	1	0	0	0	CT	C	T	0	1	0	1	32	0			0	0
0	GG	G	G	1	0	GA	G	A	0	1	0	1	CC	C	C	1	0	0	0	65	1			0	0
0	GG	G	G	1	0	GG	G	G	1	0	0	0	CT	C	T	0	1	0	1	41	0			0	1
0	GG	G	G	1	0	GA	G	A	0	1	0	1								34	0			0	0
0	GG	G	G	1	0								CT	C	T	0	1	0	1	56	1			0	0
0	GG	G	G	1	0	GG	G	G	1	0	0	0	CT	C	T	0	1	0	1	74	1			0	0
0	GG	G	G	1	0	GG	G	G	1	0	0	0	CT	C	T	0	1	0	1	54	1			0	0
0						GG	G	G	1	0	0	0	CT	C	T	0	1	0	1	65	1			0	0
0	GG	G	G	1	0	GG	G	G	1	0	0	0	CT	C	T	0	1	0	1	52	1			0	0
0	GG	G	G	1	0	GG	G	G	1	0	0	0								58	1			0	0
0	GG	G	G	1		GA	G	A	0	1	0	1	CT	C	T	0	1	0	1	55	1			0	0
0						GA	G	A	0	1	0	1	CC	C	C	1	0	0	0	52	1			1	1
0						GG	G	G	1	0	0	0	CC	C	C	1	0	0	0	44	0			0	0
0						GG	G	G	1	0	0	0	CC	C	C	1	0	0	0	53	1			0	0
0	GG	G	G	1	0	GG	G	G	1	0	0	0	CT	C	T	0	1	0	1	50	1			0	0
0	GG	G	G	1	0	GG	G	G	1	0	0	0	CC	C	C	1	0	0	0	44	0			0	0
0	GG	G	G	1	0	GG	G	G	1	0	0	0	CC	C	C	1	0	0	0	53	1			0	0
0	GG	G	G	1	0	GG	G	G	1	0	0	0	CT	C	T	0	1	0	1	61	1			0	0
0	GG	G	G	1	0	GG	G	G	1	0	0	0	CT	C	T	0	1	0	1	53	1			0	0
0	GA	G	A	0	1	GG	G	G	1	0	0	0	CC	C	C	1	0	0	0	51	1			0	0
0	GG	G	G	1	0	GG	G	G	1	0	0	0	CT	C	T	0	1	0	1	66	1			1	1
0	GA	G	A	0	1	GG	G	G	1	0	0	0	CT	C	T	0	1	0	1	62	1			0	0
0						GG	G	G	1	0	0	0	CT	C	C	0	1	0	1	31	0			0	0
0	GG	G	G	1	0	GG	G	G	1	0	0	0	CC	C	C	1	0	0	0	47	0			0	0
0	GG	G	G	1	0	GG	G	G	1	0	0	0	CC	C	C	1	0	0	0	58	1			0	0
0	GG	G	G			GG	G	G	1	0	0	0	CT	C	T	0	1	0	1	28	0			0	0
0						GG	G	G	1	0	0	0	CC	C	C	1	0	0	0	56	1			0	0
0						GG	G	G	1	0	0	0	CC	C	C	1	0	0	0	50	1			0	0
0						GG	G	G	1	0	0	0	CT	C	T	0	1	0	1	39	0			0	0
0						GG	G	G	1	0	0	0	CT	C	T	0	1	0	1	53	1			0	0
0	GG	G	G	1	0	GG	G	G	1	0	0	0	CC	C	C	1	0	0	0	48	0			0	1
0						GG	G	G	1	0	0	0	CT	C	T	0	1	0	1	56	1			0	0
0						GG	G	G	1	0	0	0	CT	C	T	0	1	0	1	48	0			0	0
0						GG	G	G	1	0	0	0	CC	C	C	1	0	0	0	62	1			0	0
0						GG	G	G	1	0	0	0	CC	C	C	1	0	0	0	55	1			0	0
0						GG	G	G	1	0	0	0	CC	C	C	1	0	0	0	50	1			1	0
0						GG	G	G	1	0	0	0	CT	C	T	0	1	0	1	49	0			0	0
0						GG	G	G	1	0	0	0	CC	C	C	1	0	0	0	45	0			0	0
0						GG	G	G	1	0	0	0	CC	C	C	1	0	0	0	50	1			0	0
0						GG	G	G	1	0	0	0	CT	C	T	0	1	0	1	50	1			0	0
0	GG	G	G	1	0	GG	G	G	1	0	0	0	CT	C	T	0	1	0	1	60	1			0	0
0	GG	G	G	1	0	GG	G	G	1	0	0	0								67	1			0	0
0						GG	G	G	1	0	0	0	CC	C	C	1	0	0	0	48	0			0	1
0	GG	G	G	1	0	GG	G	G	1	0	0	0	CT	C	T	0	1	0	1	34	0			0	0
0	GG	G	G	1	0	GG	G	G	1	0	0	0	CC	C	C	1	0	0	0	35	0			0	0
0						GG	G	G	1	0	0	0	CT	C	T	0	1	0	1	41	0			0	0
0	GG	G	G	1	0	GG	G	G	1	0	0	0	CC	C	C	1	0	0	0	73	1			0	0
0	GG	G	G	1	0	GG	G	G	1	0	0	0	TT	T	T	0	0	1	1	52	1			0	0
0						GG	G	G	1	0	0	0	CT	C	T	0	1	0	1	31	0			1	0
0	GG	G	G	1	0	GG	G	G	1	0	0	0	CC	C	C	1	0	0	0	57	1			0	1
0						GG	G	G	1	0	0	0	CT	C	T	0	1	0	1	57	1			0	0
0						GG	G	G	1	0	0	0	CC	C	C	1	0	0	0	35	0			0	0
0	GG	G	G	1	0	GG	G	G	1	0	0	0	CC	C	C	1	0	0	0	52	1			0	0
0						GG	G	G	1	0	0	0	CT	C	T	0	1	0	1	45	0			0	0
0						GG	G	G	1	0	0	0	CC	C	C	1	0	0	0	48	0			0	0
0						GG	G	G	1	0	0	0	CT	C	T	0	1	0	1	56	1			0	1
0						GG	G	G	1	0	0	0	CC	C	C	1	0	0	0	59	1			0	0
0						GG	G	G	1	0	0	0	CT	C	T	0	1	0	1	32	0			0	0
0						GG	G	G	1	0	0	0	CC	C	C	1	0	0	0	39	0			0	0
0						GG	G	G	1	0	0	0								60	1			0	0
0						GG	G	G	1	0	0	0								62	1			0	0
0	GG	G	G	1	0	GG	G	G	1	0	0	0								32	0			0	0
0						GG	G	G	1	0	0	0								66	1			0	0
0						GG	G	G	1	0	0	0	CT	C	T	0	1	0	1	59	1			0	0
0						GG	G	G	1	0	0	0	CC	C	C	1	0	0	0	45	0			0	0
0						GA	G	A	0	1	0	0	CT	C	T	0	1	0	1	50	1			0	0
0	GG	G	G	1	0	GG	G	G	1	0	0	0	CC	C	C	1	0	0	0	47	0			1	0
0						GG	G	G	1	0	0	0	CC	C	C	1	0	0	0	51	1			1	1
0	GG	G	G	1	0	GA	G	A	0	1	0	0	CT	C	T	0	1	0	1	55	1			1	1
0	GG	G	G	1	0	GG	G	G	1	0	0	0	CC	C	C	1	0	0	0	55	1			0	0
0						GG	G	G	1	0	0	0	CC	C	C	1	0	0	0	39	0			0	0
0	GG	G	G	1	0	GG	G	G	1	0	0	0	CC	C	C	1	0	0	0	60	1			0	0
0													CT	C	T	0	1	0	1	84	1			0	0
0						GG	G	G	1	0	0	0	CT	C	T	0	1	0	1	69	1			0	0
0						GG	G	G	1	0	0	0	CT	C	T	0	1	0	1	63	1			0	0
0	GG	G	G	1	0	GG	G	G	1	0	0	0	CC	C	C	1	0	0	0	50	1			0	0
0	GG	G	G	1	0	AA	A	A	0	0	1	1								42	0			0	1
0	GG	G	G	1	0								CC	C	C	1	0	0	0	59	1			0	0
0	GG	G	G	1	0								CC	C	C	1	0	0	0	33	0			0	0
0	GG	G	G	1	0								CC	C	C	1	0	0	0	61	1			0	0
0	GG	G	G	1	0	GG	G	G	1	0	0	0	CC	C	C	1	0	0	0	73	1			0	0
0						GG	G	G	1	0	0	0	CC	C	C	1	0	0	0	74	1			0	0
0						GG	G	G	1	0	0	0	CC	C	C	1	0	0	0	51	1			0	0
0													CC	C	C	1	0	0	0	51	1			1	0
0						GG	G	G	1	0	0	0	CT	C	T	0	1	0	1	64	1			0	0
0						GG	G	G	1	0	0	0								44	0			0	0
0	GG	G	G	1	0	GG	G	G	1	0	0	0	CC	C	C	1	0	0	0	55	1			0	0
0						GG	G	G	1	0	0	0	CC	C	C	1	0	0	0	55	1			0	0
0						GG	G	G	1	0	0	0								68	1			0	0
0						AA	A	A	0	0	1	1								84	1			0	0
0													CC	C	C	1	0	0	0	79	1			0	0
0						GG	G	G	1	0	0	0	CT	C	T	0	1	0	1	29	0			0	0
0						GG	G	G	1	0	0	0								52	1			0	0
0						GA	G	A	0	1	0	1								57	1			1	0
0													CT	C	T	0	1	0	1	76	1			0	1
0						GG	G	G	1	0	0	0	TT	T	T	0	0	1	1	48	0			0	0
0	GG	G	G	1	0	GG	G	G	1	0	0	0	CC	C	C	1	0	0	0	65	1			0	0
0	GG	G	G	1	0	GG	G	G	1	0	0	0	CC	C	C	1	0	0	0	53	1			0	0
0						GA	G	A	0	1	0	1	CC	C	C	1	0	0	0	33	0			0	0
0													CC	C	C	1	0	0	0	60	1			0	0
0						GA	G	A	0	1	0	1	CT	C	T	0	1	0	1	56	1			1	0
0						GG	G	G	1	0	0	0	CC	C	C	1	0	0	0	31	0			0	0
0						GG	G	G	1	0	0	0	CC	C	C	1	0	0	0	51	1			0	0
0						GA	G	A	0	1	0	1	CT	C	T	0	1	0	1	52	1			0	0
0													CC	C	C	1	0	0	0	57	1			0	0
0						GG	G	G	1	0	0	0	CT	C	T	0	1	0	1	58	1			0	0
0						GG	G	G	1	0	0	0	CC	C	C	1	0	0	0	60	1			0	0
0						GG	G	G	1	0	0	0								52	1			0	0
0						GG	G	G	1	0	0	0	CC	C	C	1	0	0	0	52	1			0	0
0						GG	G	G	1	0	0	0	CC	C	C	1	0	0	0	52	1			0	0
0	GG	G	G	1	0	GG	G	G	1	0	0	0								47	0			0	0
0													CC	C	C	1	0	0	0	50	1			0	1
0						GG	G	G	1	0	0	0	CT	C	T	0	1	0	1	67	1			0	0
0													CT	C	T	0	1	0	1	47	0			0	0
0						GG	G	G	1	0	0	0	CC	C	C	1	0	0		45	0			0	0
0						GG	G	G	1	0	0	0	CT	C	T	0	1	0	1	69	1			0	0
0						GG	G	G	1	0	0	0								54	1			0	1
0						GG	G	G	1	0	0	0	CT	C	T	0	1	0	1	49	0			0	0
0						GG	G	G	1	0	0	0								66	1			1	0
0	GG	G	G	1	0	GG	G	G	1	0	0	0	CC	C	C	1	0	0	0	50	1			0	0
0						GG	G	G	1	0	0	0	CC	C	C	1	0	0	0	41	0			1	0
0						GA	G	A	0	1	0	1	CT	C	T	0	1	0	1	44	0			0	0
0						GA	G	A	0	1	0	1	TT	T	T	0	0	1	1	61	1			0	0
0													CT	C	T	0	1	0	1	68	1			0	0
0													CC	C	C	1	0	0	0	58	1			0	0
0						GG	G	G	1	0	0	0								54	1			0	0
0						GG	G	G	1	0	0	0								58	1			0	0
0													CT	C	T	0	1	0	1	50	1			0	0
0						GG	G	G	1	0	0	0								47	0			0	0
0						GG	G	G	1	0	0	0	CC	C	C	1	0	0	0	59	1			0	1
0						GG	G	G	1	0	0	0	CC	C	C	1	0	0	0	46	0			0	0
0						GG	G	G	1	0	0	0	CC	C	C	1	0	0	0	38	0			0	0
0						GG	G	G	1	0	0	0	CT	C	T	0	1	0	1	51	1			0	0
0						GG	G	G	1	0	0	0								30	0			0	0
0						GG	G	G	1	0	0	0								59	1			0	0
0						GG	G	G	1	0	0	0								35	0			0	0
0						GG	G	G	1	0	0	0								46	0			0	1
0						GA	G	A	0	1	0	1								62	1			0	0
0						GA	G	A	0	1	0	1								38	0			0	0
0						GG	G	G	1	0	0	0								63	1			0	0
0						GG	G	G	1	0	0	0	CT	C	T	0	1	0	1	39	0			0	0
0						GG	G	G	1	0	0	0								52	1			1	1
0						GG	G	G	1	0	0	0								49	0			0	0
0						GG	G	G	1	0	0	0								65	1			0	0
0						GA	G	A	0	1	0	1								73	1			0	0
0						GG	G	G	1	0	0	0								64	1			0	0
0						GA	G	A	0	1	0	1								66	1			0	0
0						GA	G	A	0	1	0	1								50	1			0	0
0						AA	A	A	0	0	1	1								36	0			0	0
0						GG	G	G	1	0	0	0								62	1			0	0
0						GA	G	G	0	1	0	1								48	0			0	0
0													CT	C	T	0	1	0	1	41	0			0	0
0						GG	G	G	1	0	0	0								52	1			0	0
0						GA	G	A	0	1	0	1								34	0			0	1
0						GA	G	A	0	1	0	1								39	0			0	0
0						GA	G	A	0	1	0	1								46	0			0	0
0						GA	G	A	0	1	0	1								62	1			0	0
0						GG	G	G	1	0	0	0	TT	T	T	0	0	1	1	31	0			1	0
0						GG	G	G	1	0	0	0								65	1			0	0
0						GG	G	G	1	0	0	0								61	1			0	0
0						GG	G	G	1	0	0	0								44	0			0	0
0						GG	G	G	1	0	0	0								26	0			0	0
0						GG	G	G	1	0	0	0								38	0			1	0
0						GG	G	G	1	0	0	0								57	1			0	0
0						AA	A	A	0	0	1	1								43	0			0	1
0						GG	G	G	1	0	0	0								71	1			0	0
0	GG	G	G	1	0	GG	G	G	1	0	0	0								52	1			0	0
0	GG	G	G	1	0	GG	G	G	1	0	0	0	CT	C	T	0	1	0	1	65	1			1	0
0	GG	G	G	1	0															54	1			0	0
0	GG	G	G	1	0	GG	G	G	1	0	0	0								47	0			0	0
0	GG	G	G	1	0	GG	G	G	1	0	0	0								46	0			0	0
0	GG	G	G	1	0															69	1			0	0
0	GG	G	G	1	0	GG	G	G	1	0	0	0								23	0			1	0
0	GG	G	G	1	0	GG	G	G	1	0	0	0								46	0			0	0
0	GG	G	G	1	0	GG	G	G	1	0	0	0								33	0			0	0
0	GG	G	G	1	0															58	1			0	1
0	GG	G	G	1	0	GA	G	G	0	1	0	0								36	0			0	0
0	GG	G	G	1	0															39	0			0	0
0	GG	G	G	1	0	GA	G	G	0	1	0	0								40	0			0	0
0	GG	G	G	1	0															68	1			1	0
0	GG	G	G	1	0	GG	G	G	1	0	0	0	CT	C	T	0	1	0	1	56	1			0	0
0	GG	G	G	1	0	GG	G	G	1	0	0	0	CC	C	C	1	0	0	0	44	0			0	0
0	GG	G	G	1	0	GG	G	G	1	0	0	0								43	0			0	0
0	GG	G	G	1	0	GG	G	G	1	0	0	0								62	1			0	0
0	GG	G	G	1	0	GG	G	G	1	0	0	0	CC	C	C	1	0	0	0	55	1			0	0
0	GG	G	G	1	0	GG	G	G	1	0	0	0	CT	C	T	0	1	0	1	60	1			1	0
0	GG	G	G	1	0	GG	G	G	1	0	0	0								48	0			0	0
0	GG	G	G	1	0	GG	G	G	1	0	0	0								34	0			0	0
0	GG	G	G	1	0	GA	G	A	0	1	0	1								69	1			0	0
0						GG	G	G	1	0	0	0								49	0			0	0
0	GG	G	G	1	0															41	0			0	0
0	GG	G	G	1	0	GG	G	G	1	0	0	0								53	1			0	0
0	GG	G	G	1	0	GG	G	G	1	0	0	0								33	0			1	1
0	GG	G	G	1	0															65	1			0	0
0	GG	G	G	1	0	GA	G	A	0	1	0	0	CC	C	C	1	0	0	0	49	0			0	0
0	GG	G	G	1	0	GG	G	G	1	0	0	0	CC	C	C	1	0	0	0	37	0			0	0
0						GG	G	G	1	0	0	0								34	0			0	0
0						GG	G	G	1	0	0	0	CC	C	C	1	0	0	0	76	1			0	0
0						GG	G	G	1	0	0	0	CC	C	C	1	0	0	0	37	0			0	0
0	GG	G	G	1	0	GG	G	G	1	0	0	0	CC	C	C	1	0	0	0	35	0			1	0
0	GG	G	G	1	0	GG	G	G	1	0	0	0								46	0			0	0
0						GA	G	A	0	1	0	0								22	0			0	0
0	GG	G	G	1	0	GG	G	G	1	0	0	0								38	0			0	0
0	GG	G	G	1	0	GG	G	G	1	0	0	0	CC	C	C	1	0	0	0	32	0			0	1
0	GG	G	G	1	0	GG	G	G	1	0	0	0								40	0			1	0
0	GG	G	G	1	0	GG	G	G	1	0	0	0								37	0			0	0
0	GG	G	G	1	0															42	0			0	0
0	GG	G	G	1	0	GG	G	G	1	0	0	0								51	1			0	1
0						GA	G	A	0	1	0	1								59	1			0	0
0	GG	G	G	1	0	GG	G	G	1	0	0	0	CC	C	C	1	0	0	0	51	1			1	0
0	GG	G	G	1	0	GG	G	G	1	0	0	0	CT	C	T	0	1	0	1	55	1			0	0
0	GG	G	G	1	0								CC	C	C	1	0	0	0	44	0			0	0
0						GA	G	A	0	1	0	1	CT	C	T	0	1	0	1	61	1			0	0
0						GG	G	G	1	0	0	0	CC	C	C	1	0	0	0	48	0			0	1
0						GG	G	G	1	0	0	0	CC	C	C	1	0	0	0	62	1			0	0
0						GG	G	G	1	0	0	0								47	0			0	1
0						GG	G	G	1	0	0	0	CT	C	T	0	1	0	1	56	1			0	0
0						GG	G	G	1	0	0	0	CT	C	T	0	1	0	1	48	0			0	0
0	GG	G	G	1	0															60	1			0	0
0	GG	G	G	1	0	GA	G	A	0	1	0	1								65	1			0	0
0	GG	G	G	1	0	GG	G	G	1	0	0	0	CT	C	T	0	1	0	1	54	1			1	1
0	GG	G	G	1	0	GG	G	G	1	0	0	0		C	C					44	0			0	0
0	GG	G	G	1	0	GA	G	A	0	1	0	1	CC	C	C	1	0	0	0	63	1			0	0
0	GG	G	G	1	0	GG	G	G	1	0	0	0	CT	C	T	0	1	0	1	41	0			0	0
0	GG	G	G	1	0	GG	G	G	1	0	0	0	CC	C	C	1	0	0	0	62	1			0	0
0	GG	G	G	1	0	GG	G	G	1	0	0	0	CC	C	C	1	0	0	0	62	1			0	0
0	GG	G	G	1	0	GG	G	G	1	0	0	0	CT	C	T	0	1	0	1	57	1			0	0
0	GG	G	G	1	0	GG	G	G	1	0	0	0	CT	C	T	0	1	0	1	49	0			0	0
0	GG	G	G	1	0	GG	G	G	1	0	0	0	CC	C	C	1	0	0	0	62	1			0	0
0	GG	G	G	1	0	GG	G	G	1	0	0	0	CC	C	C	1	0	0	0	72	1			0	0
0	GG	G	G	1	0	GG	G	G	1	0	0	0	CC	C	C	1	0	0	0	59	1			0	0
0	GG	G	G	1	0	GG	G	G	1	0	0	0	CC	C	C	1	0	0	0	60	1			0	1
0	GG	G	G	1	0	GG	G	G	1	0	0	0	CC	C	C	1	0	0	0	69	1			0	0
0	GG	G	G	1	0	GG	G	G	1	0	0	0	CC	C	C	1	0	0	0	69	1			0	0
0	GG	G	G	1	0	GG	G	G	1	0	0	0	CT	C	T	0	1	0	1	60	1			1	1
[truncated: 11 more columns]
